# Supplementary material for: Isolation and target identification of antihepatoma polyprenylphenols from the edible mushroom Suillus granulatus
Source: Royal Society of Chemistry journal article supplement (doi:10.1039/d4fo01500b), 2024-01-01
Supplement: d4fo01500b1.pdf [file d4fo01500b1.pdf]

## **Isolation and target identification of antihepatoma polyprenylphenols from edible mushroom *Suillus granulatus***

Hanyu Zhao<sup>a</sup>, Miaomiao Xiong<sup>a</sup>, Xiaomin Yang<sup>a</sup>, Lan Yao<sup>b</sup>, Zhuang Li<sup>a</sup>, Jinxiu Zhang<sup>a, \*</sup>, Jianhua Lv<sup>a, \*</sup>

<sup>a</sup> *College of Life Sciences, Hebei Normal University, Shijiazhuang, China*

<sup>b</sup> *Institute of Biology, Hebei Academy of Science, Shijiazhuang, China*

\*corresponding author

Jian-Hua Lv : lvjianhua@hebtu.edu.cn

Jin-Xiu Zhang : xiudou882003@163.com

**Fig. S1.** HRESI-MS of compound **2**

**Fig. S2.**  $^1\text{H}$  NMR spectrum of compound **2**

**Fig. S3.**  $^{13}\text{C}$  NMR spectrum of compound **2**

**Fig. S4.** HSQC spectrum of compound **2**

**Fig. S5.** HMBC spectrum of compound **2**

**Fig. S6.**  $^1\text{H}$ - $^1\text{H}$  COSY spectrum of compound **2**

**Fig. S7.** Noesy spectrum of compound **2**

**Fig. S8.** HRESI-MS of compound **3**

**Fig. S9.**  $^1\text{H}$  NMR spectrum of compound **3**

**Fig. S10.**  $^{13}\text{C}$  NMR spectrum of compound **3**

**Fig. S11.** HSQC spectrum of compound **3**

**Fig. S12.** HMBC spectrum of compound **3**

**Fig. S13.**  $^1\text{H}$ - $^1\text{H}$  COSY spectrum of compound **3**

**Fig. S14.** Noesy spectrum of compound **3**

**Fig. S15.** HRESI-MS of compound **4**

**Fig. S16.**  $^1\text{H}$  NMR spectrum of compound **4**

**Fig. S17.**  $^{13}\text{C}$  NMR spectrum of compound **4**

**Fig. S18.** HSQC spectrum of compound **4**

**Fig. S19.** HMBC spectrum of compound **4**

**Fig. S20.**  $^1\text{H}$ - $^1\text{H}$  COSY spectrum of compound **4**

**Fig. S21.** Noesy spectrum of compound **4**

**Fig. S22.** HRESI-MS of compound **5**

**Fig. S23.**  $^1\text{H}$  NMR spectrum of compound **5**

**Fig. S24.**  $^{13}\text{C}$  NMR spectrum of compound **5**

**Fig. S25.** HSQC spectrum of compound **5**

**Fig. S26.** HMBC spectrum of compound **5**

**Fig. S27.**  $^1\text{H}$ - $^1\text{H}$  COSY spectrum of compound **5**

**Fig. S28.** HRESI-MS of compound **6**

**Fig. S29.**  $^1\text{H}$  NMR spectrum of compound **6**

**Fig. S30.**  $^{13}\text{C}$  NMR spectrum of compound **6**

**Fig. S31.** HSQC spectrum of compound **6**

**Fig. S32.** HMBC spectrum of compound **6**

**Fig. S33.**  $^1\text{H}$ - $^1\text{H}$  COSY spectrum of compound **6**

**Fig. S34.** Noesy spectrum of compound **6**

**Fig. S35.** HRESI-MS of compound **7**

**Fig. S36.**  $^1\text{H}$  NMR spectrum of compound **7**

**Fig. S37.**  $^{13}\text{C}$  NMR spectrum of compound **7**

**Fig. S38.** HSQC spectrum of compound **7**

**Fig. S39.** HMBC spectrum of compound **7**

**Fig. S40.**  $^1\text{H}$ - $^1\text{H}$  COSY spectrum of compound **7**

**Fig. S41.** Noesy spectrum of compound **7**

**Fig. S42.** HRESI-MS of compound **8**

**Fig. S43.**  $^1\text{H}$  NMR spectrum of compound **8**

**Fig. S44.**  $^{13}\text{C}$  NMR spectrum of compound **8**

**Fig. S45.** HSQC spectrum of compound **8**

**Fig. S46.** HMBC spectrum of compound **8**

**Fig. S47.**  $^1\text{H}$ - $^1\text{H}$  COSY spectrum of compound **8**

**Fig. S48.** The TIC of LC-MS/MS identification

**Fig. S49.** HSP90AA1 peptide mass spectrograms

**Fig. S50.** The original image of the full gel

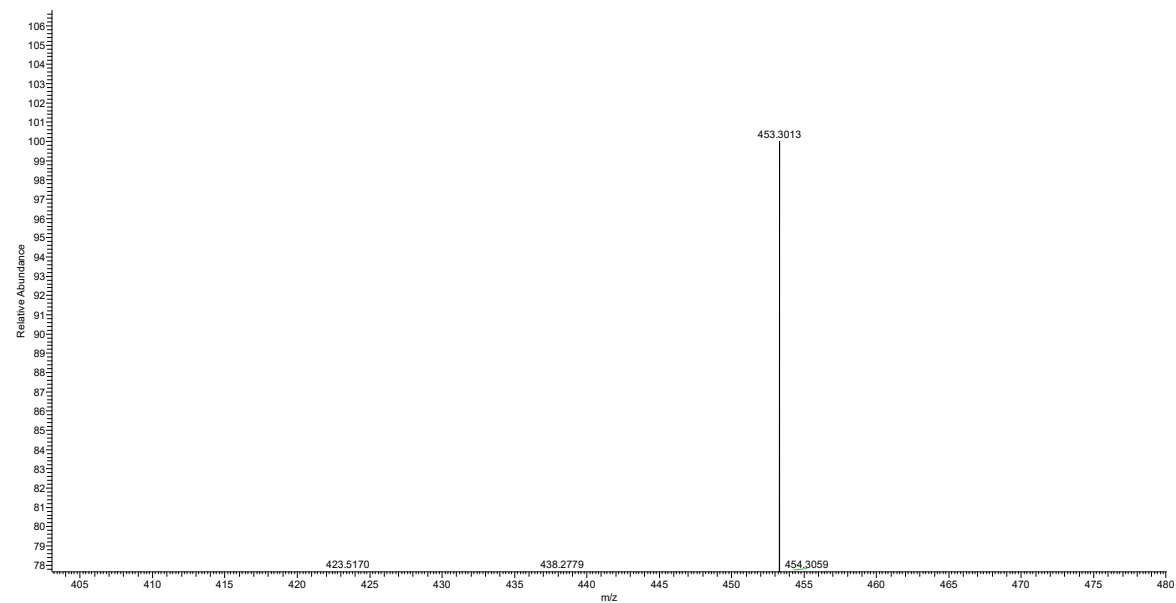

Fig. S1. HRESI-MS of compound 2

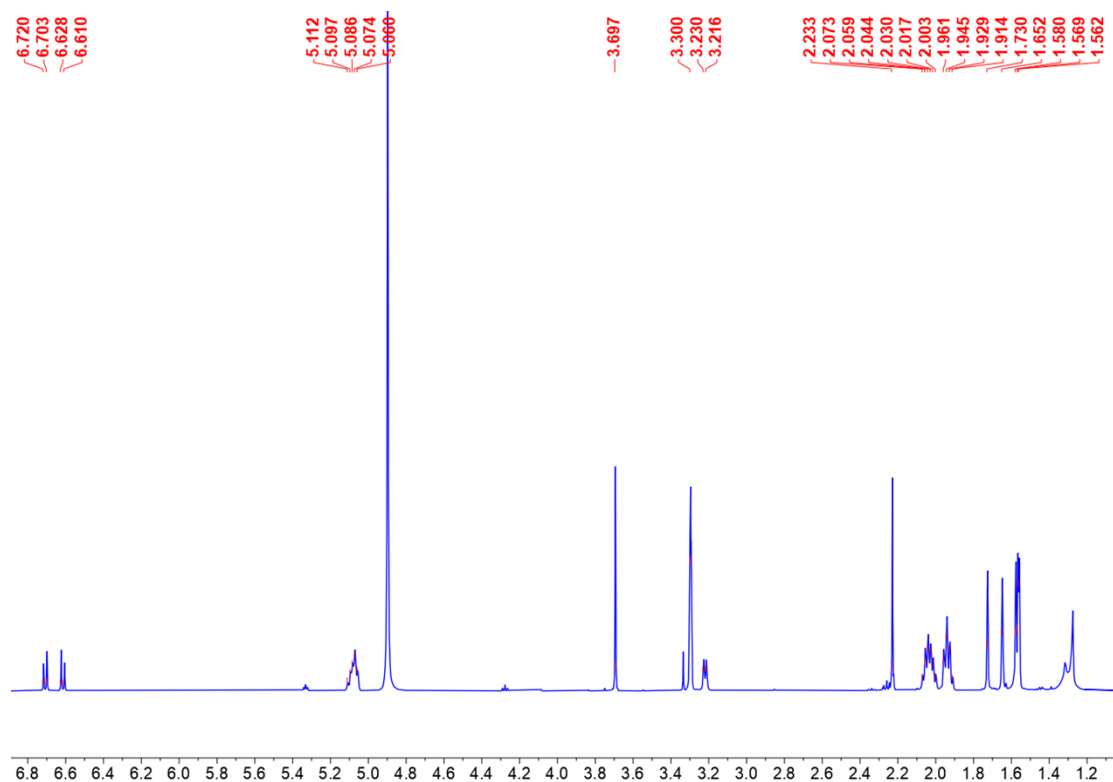

Fig. S2. <sup>1</sup>H NMR spectrum of compound 2

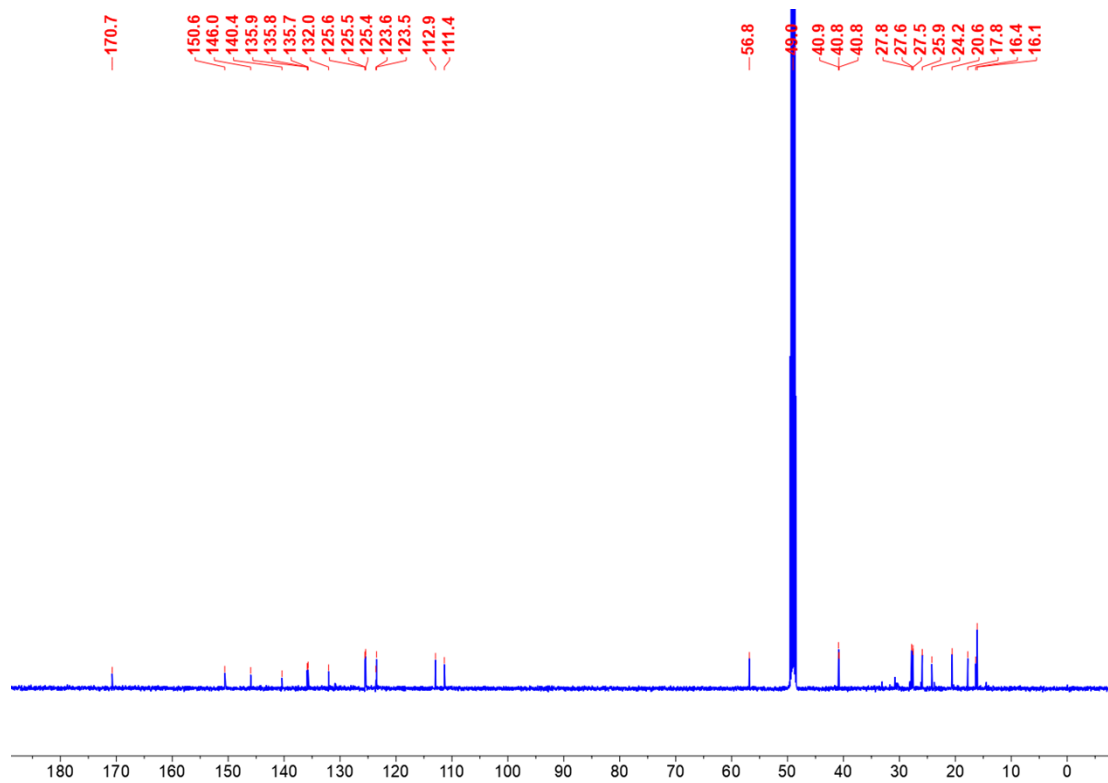

Fig. S3.  $^{13}\text{C}$  NMR spectrum of compound 2

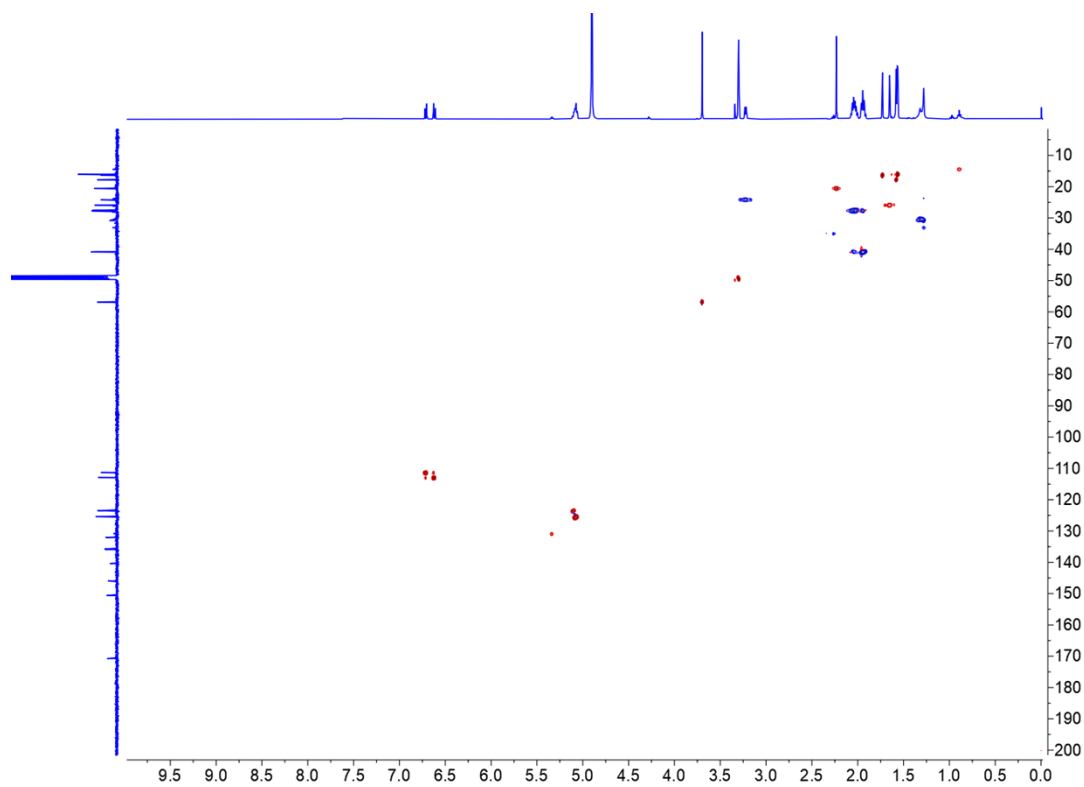

Fig. S4. HSQC spectrum of compound 2

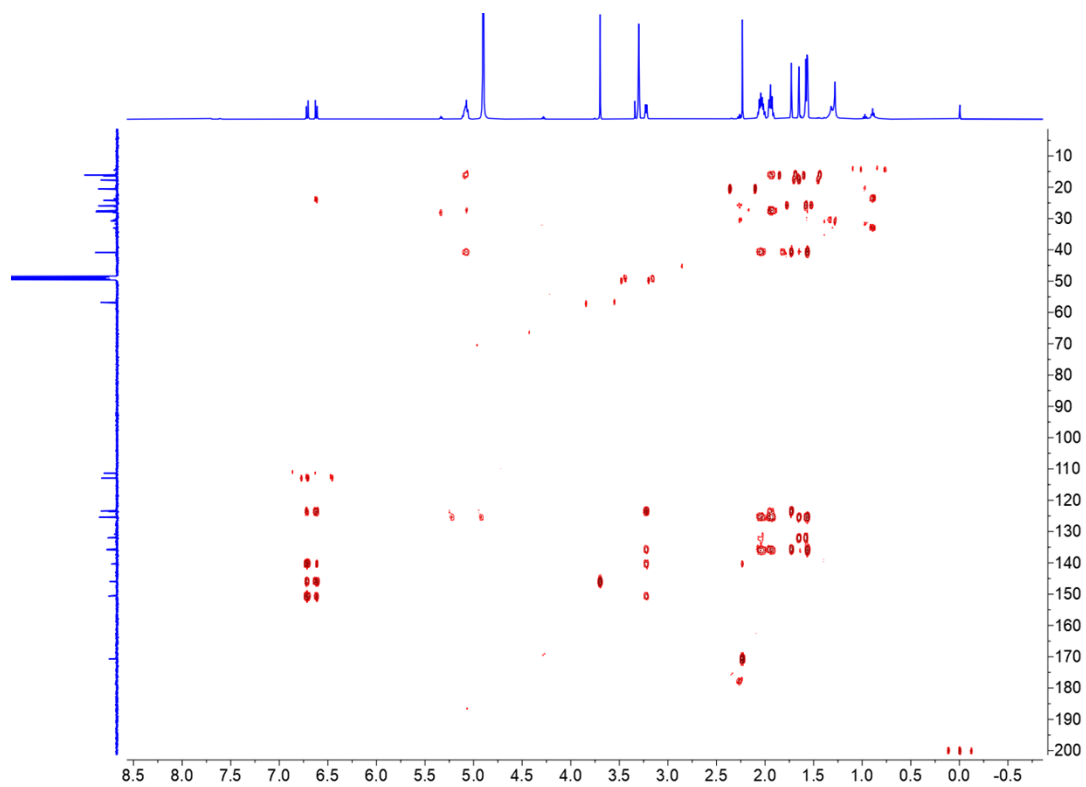

Fig. S5. HMBC spectrum of compound 2

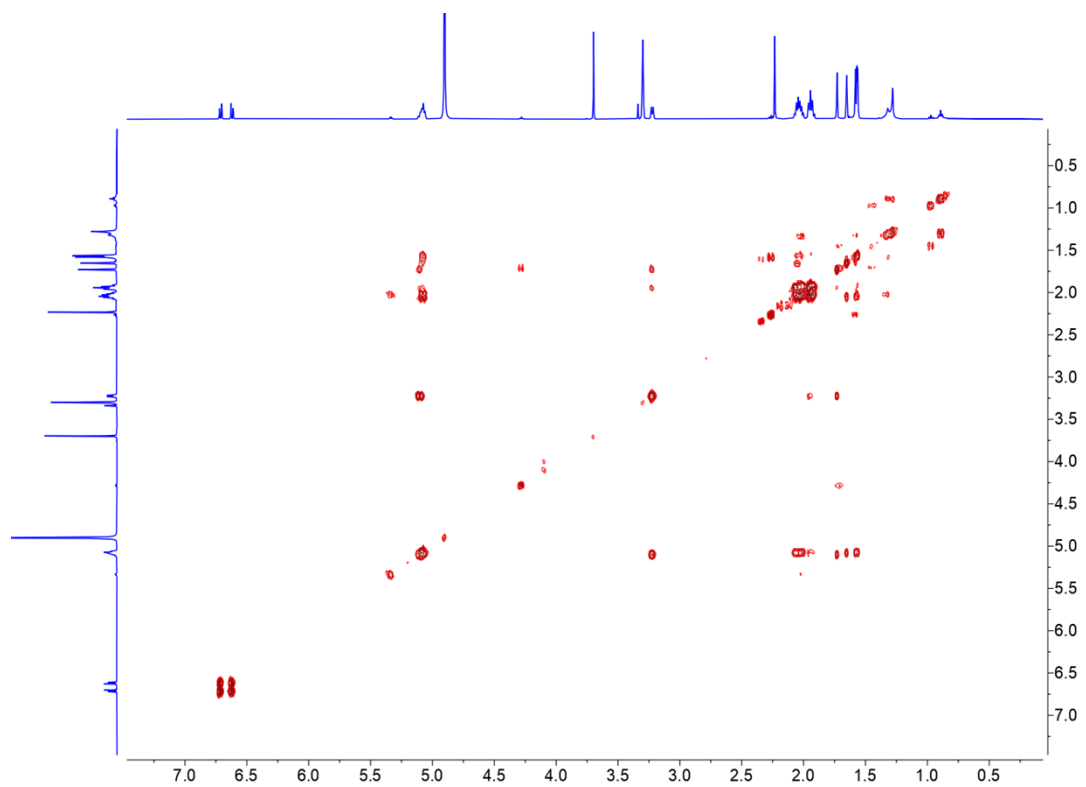

Fig. S6.  $^1\text{H}$ - $^1\text{H}$  COSY spectrum of compound 2

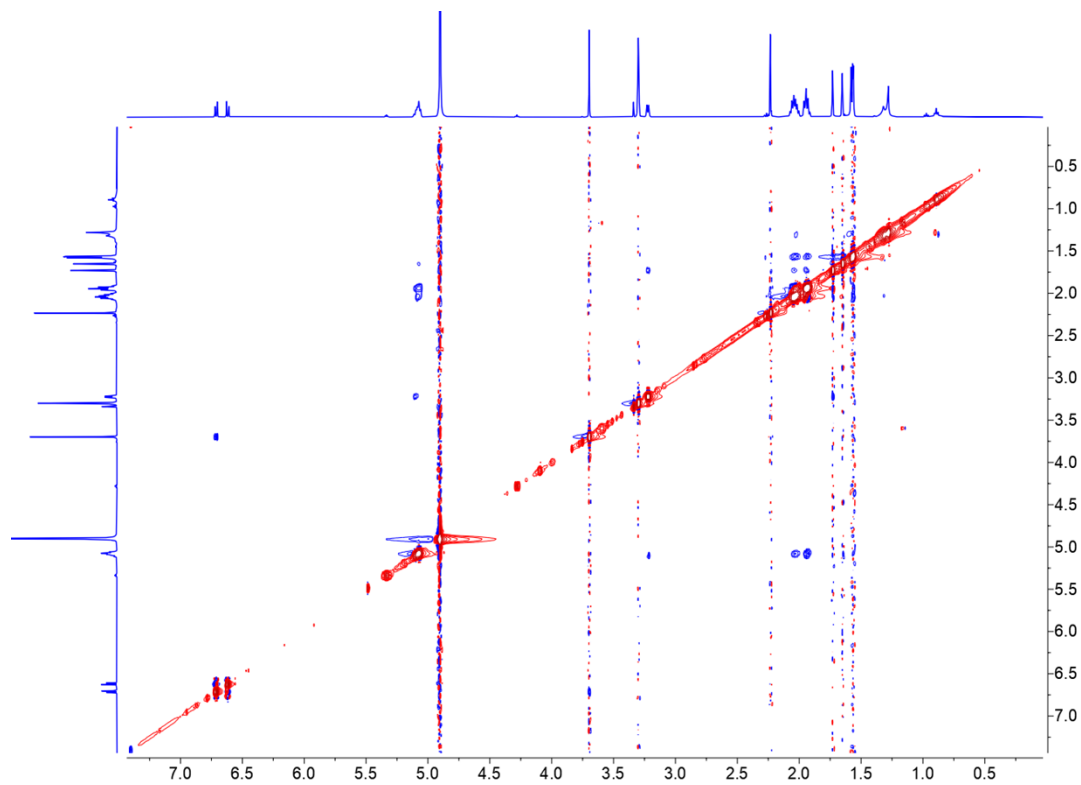

**Fig. S7.** Noesy spectrum of compound 2

CB #28 RT: 0.15 AV: 1 NL: 8.87E8  
T: FTMS -p ESI Full ms [100.0000-1000.0000]

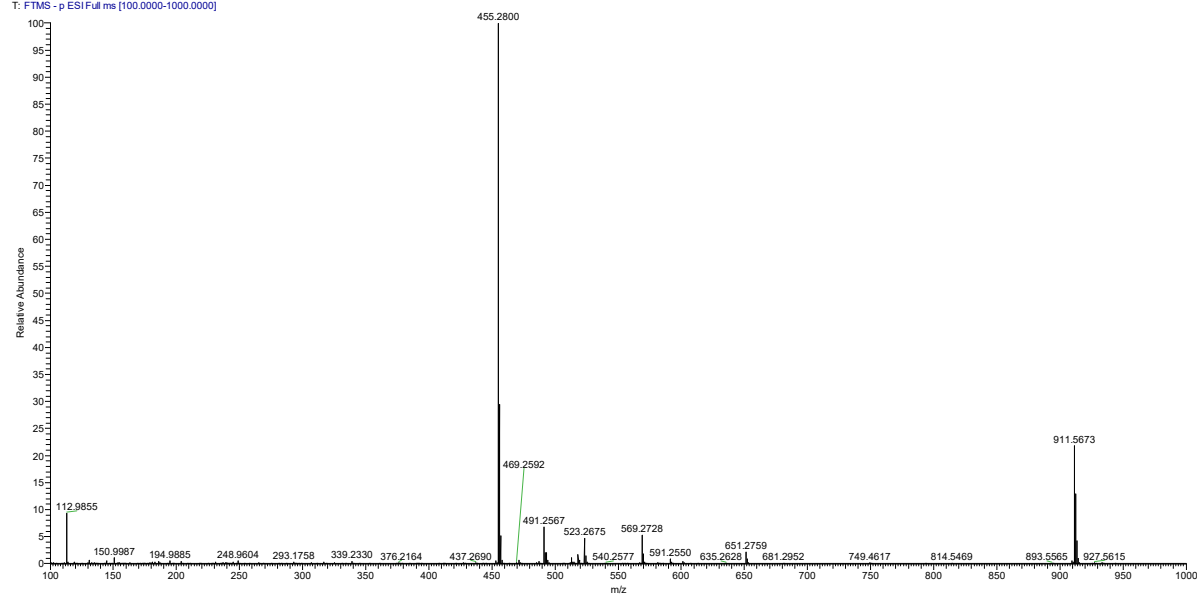

**Fig. S8.** HRESI-MS of compound 3

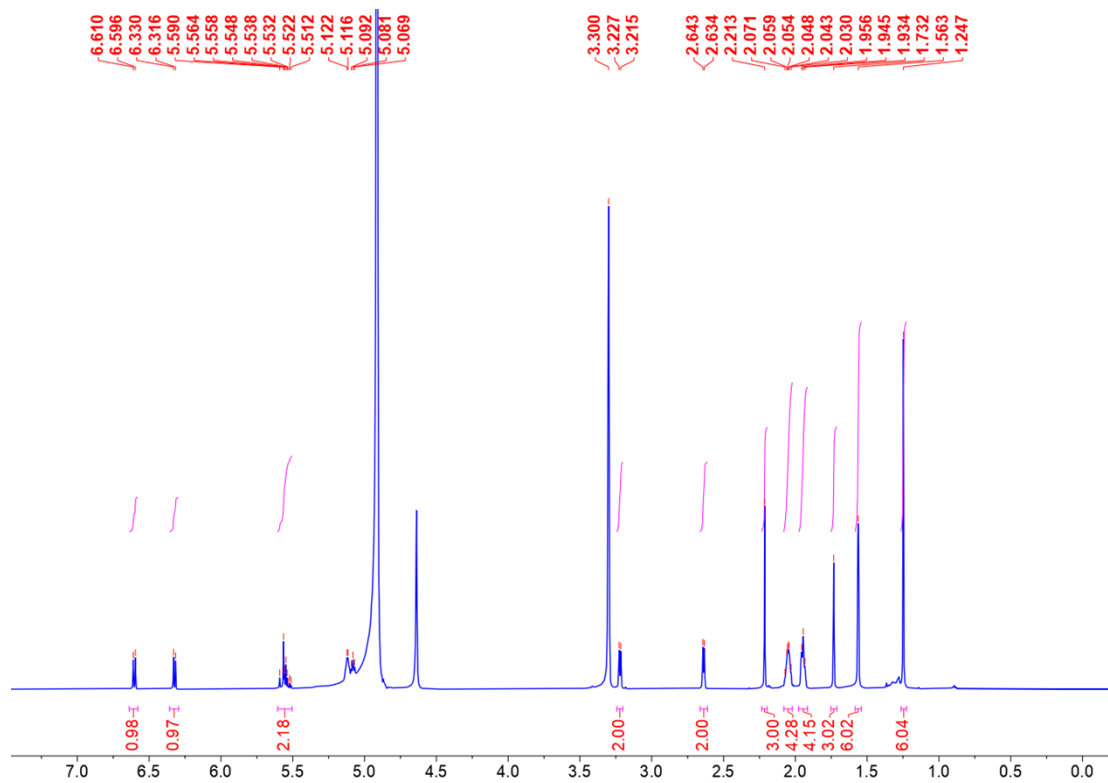

Fig. S9.  $^1\text{H}$  NMR spectrum of compound **3**

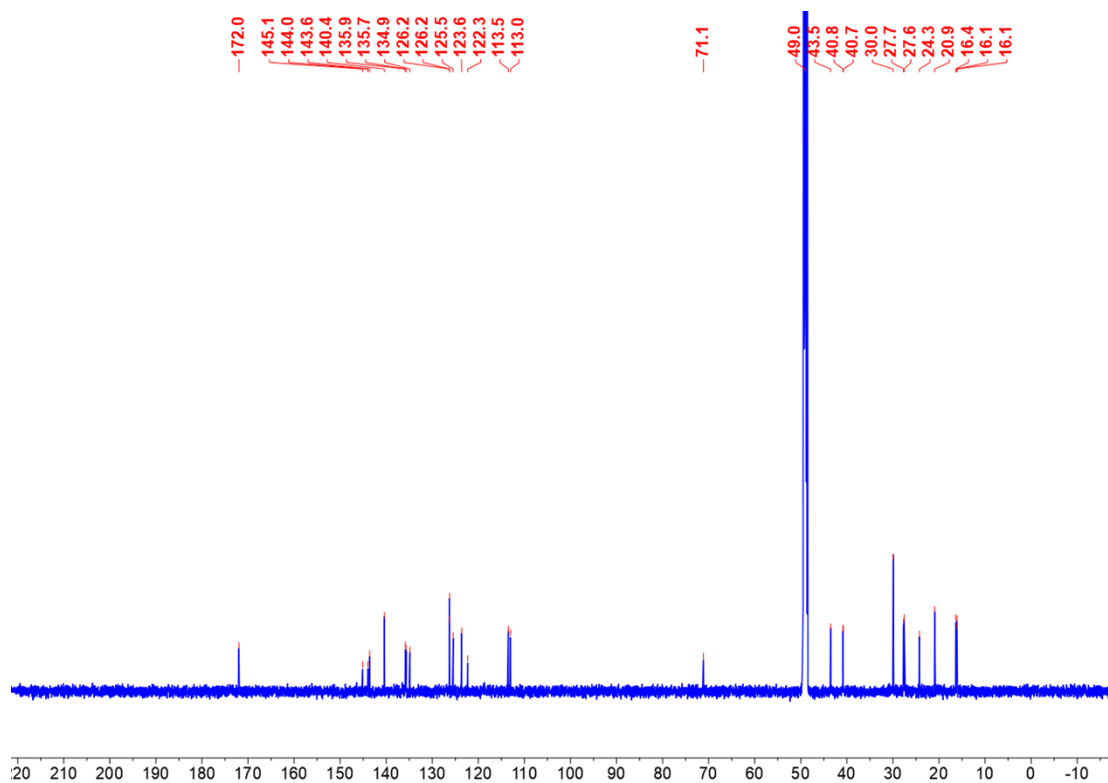

Fig. S10.  $^{13}\text{C}$  NMR spectrum of compound **3**



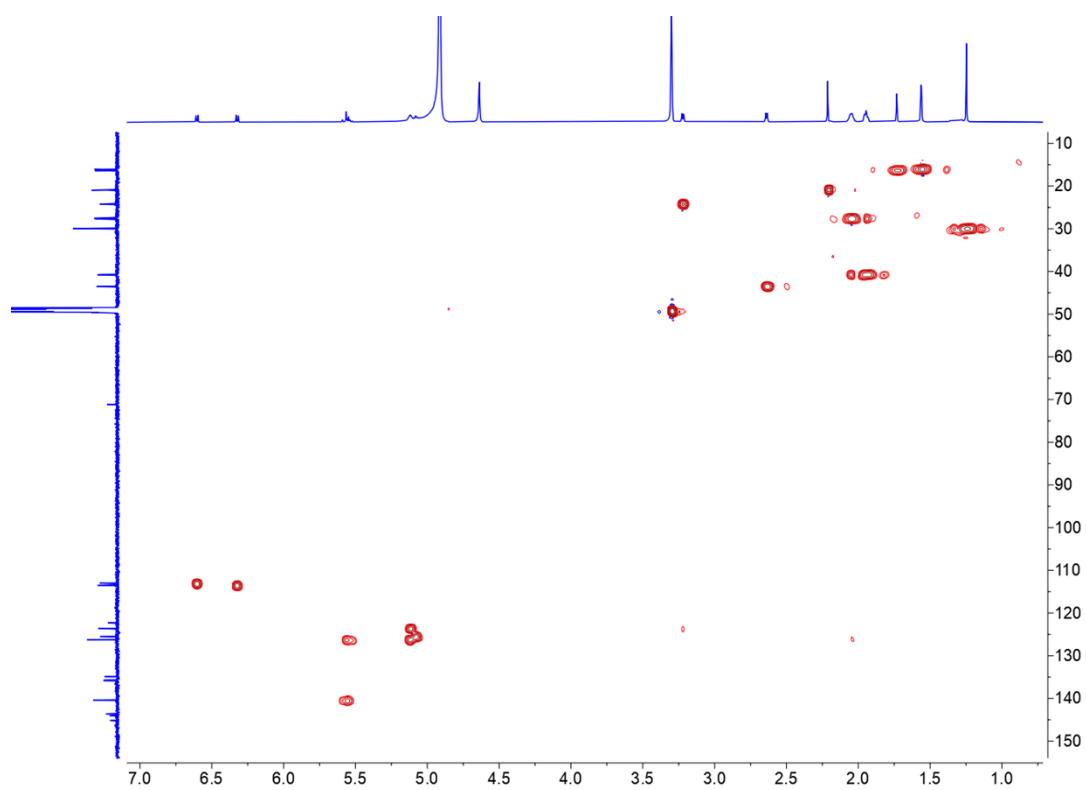

Fig. S11. HSQC spectrum of compound **3**

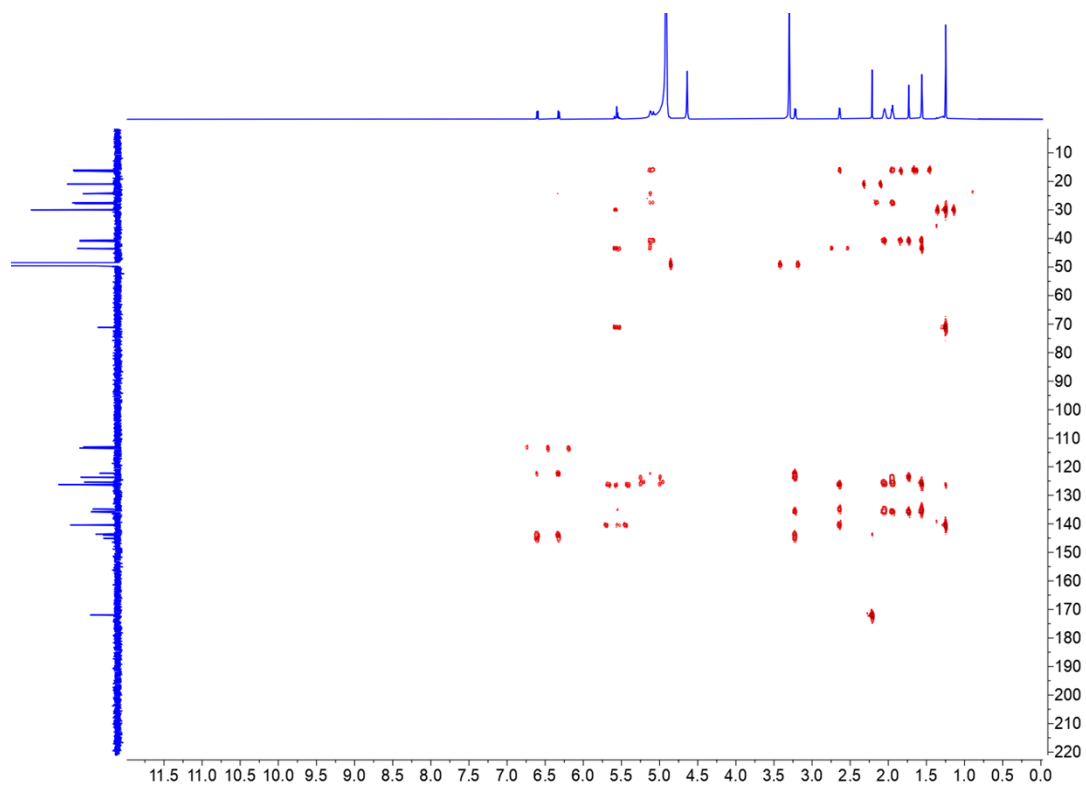

Fig. S12. HMBC spectrum of compound **3**

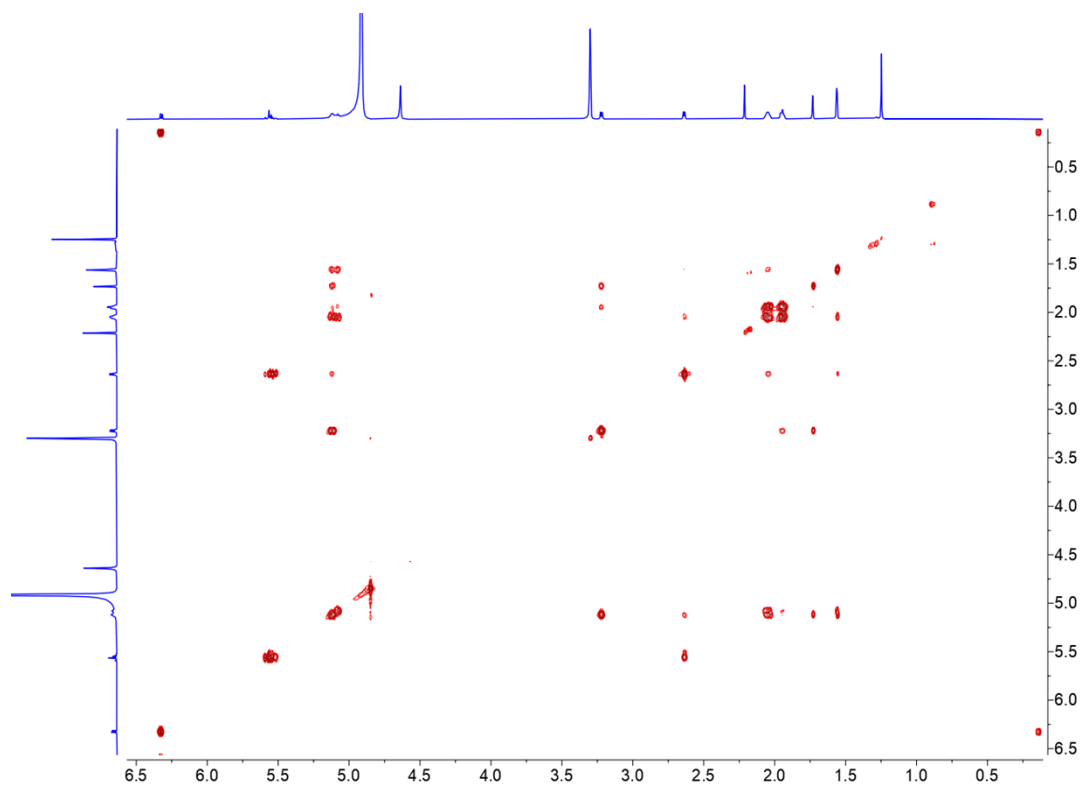

**Fig. S13.**  $^1\text{H}$ - $^1\text{H}$  COSY spectrum of compound **3**

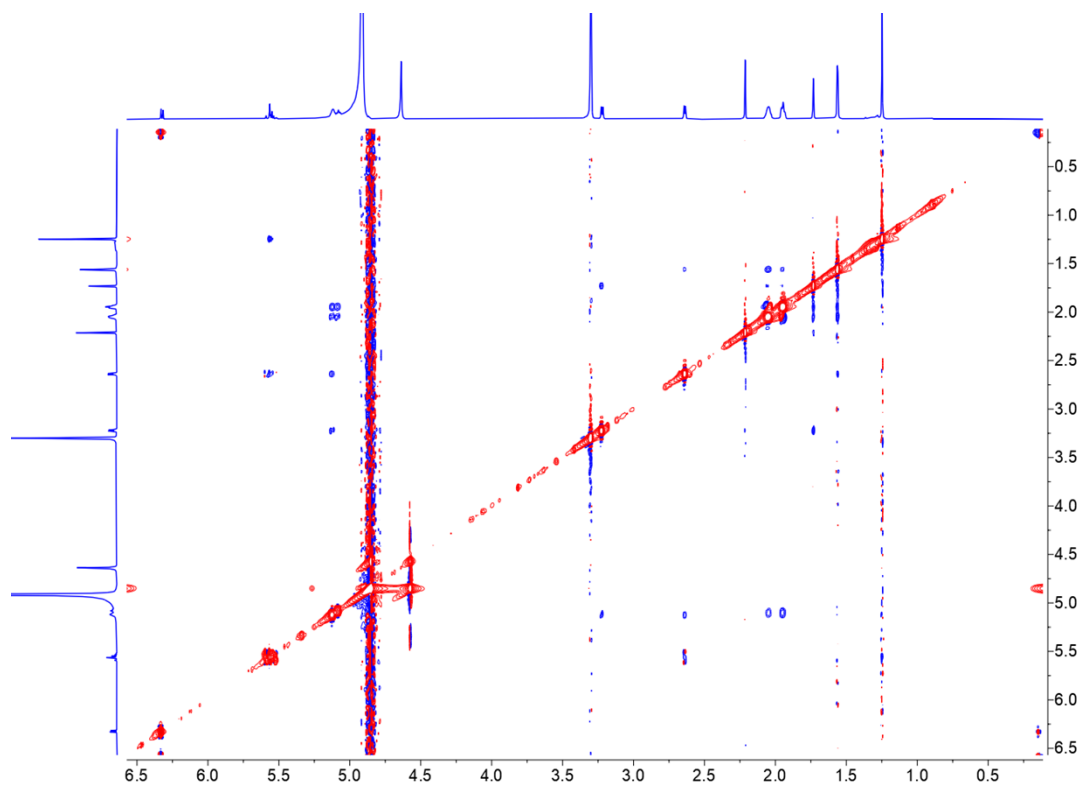

**Fig. S14.** Noesy spectrum of compound **3**

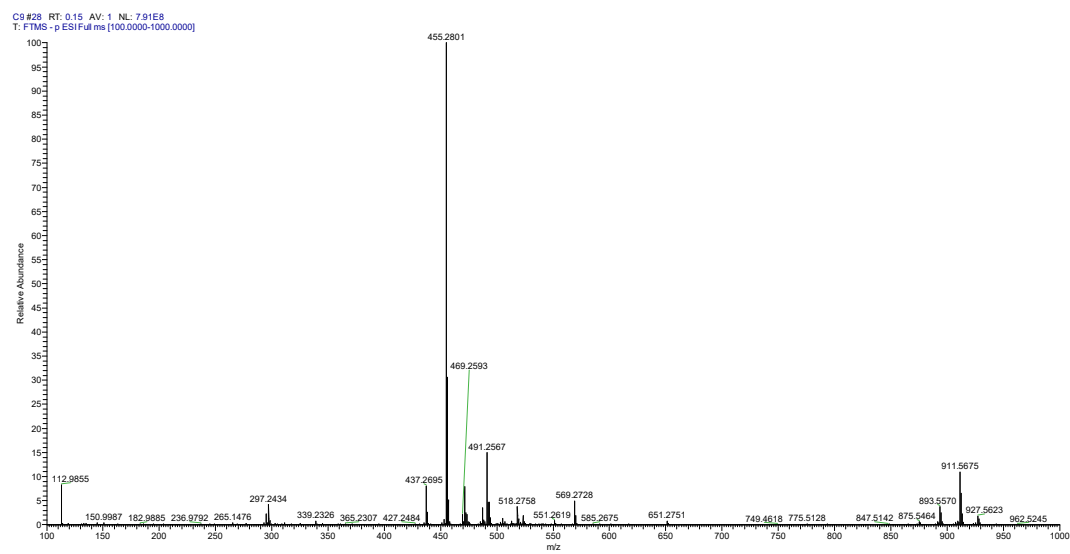

**Fig. S15.** HRESI-MS of compound **4**

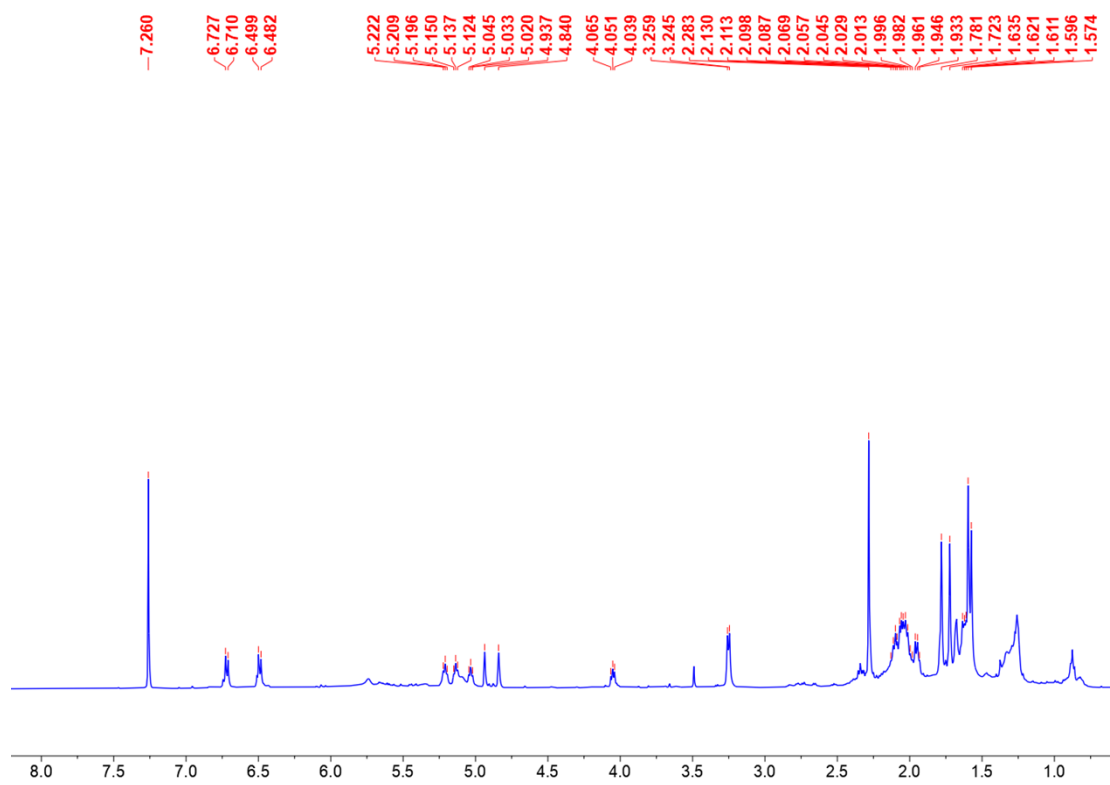

**Fig. S16.**  $^1\text{H}$  NMR spectrum of compound **4**

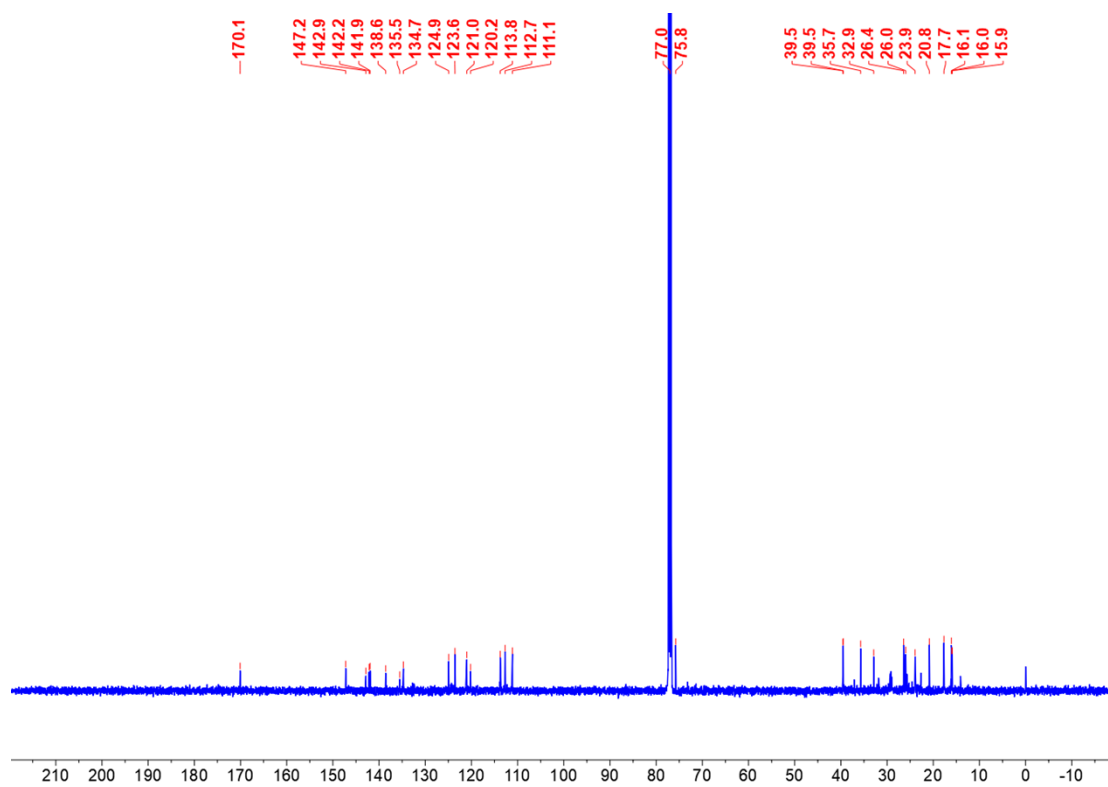

Fig. S17. <sup>13</sup>C NMR spectrum of compound 4

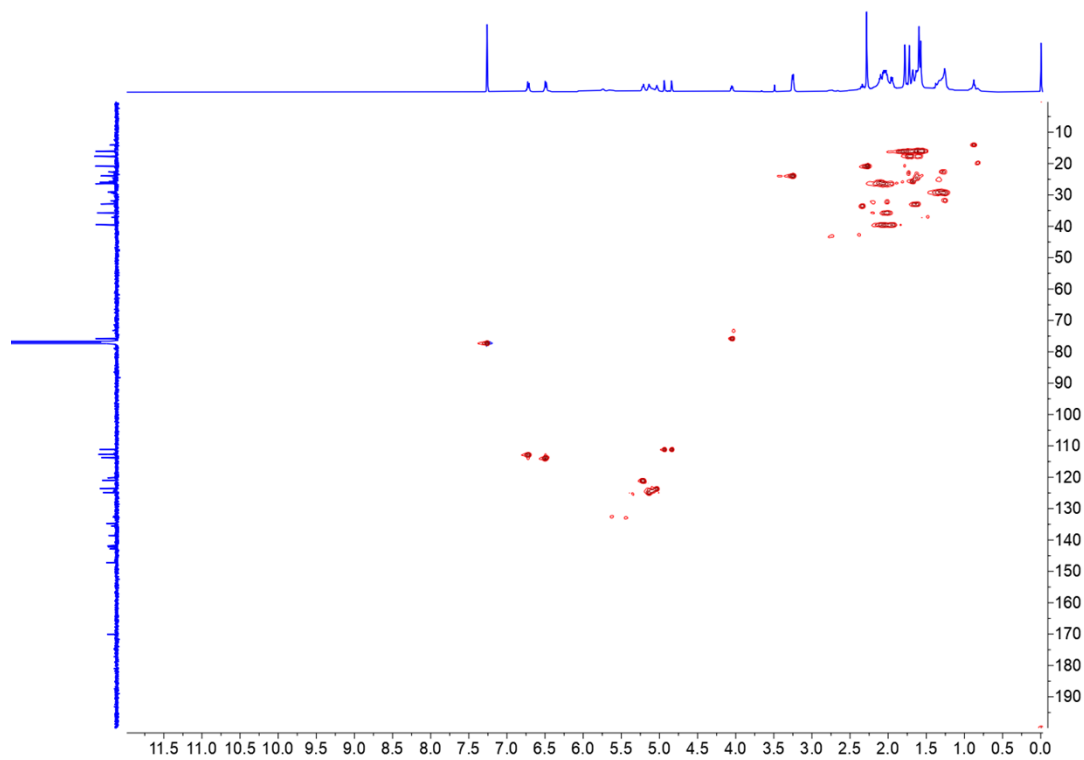

Fig. S18. HSQC spectrum of compound 4

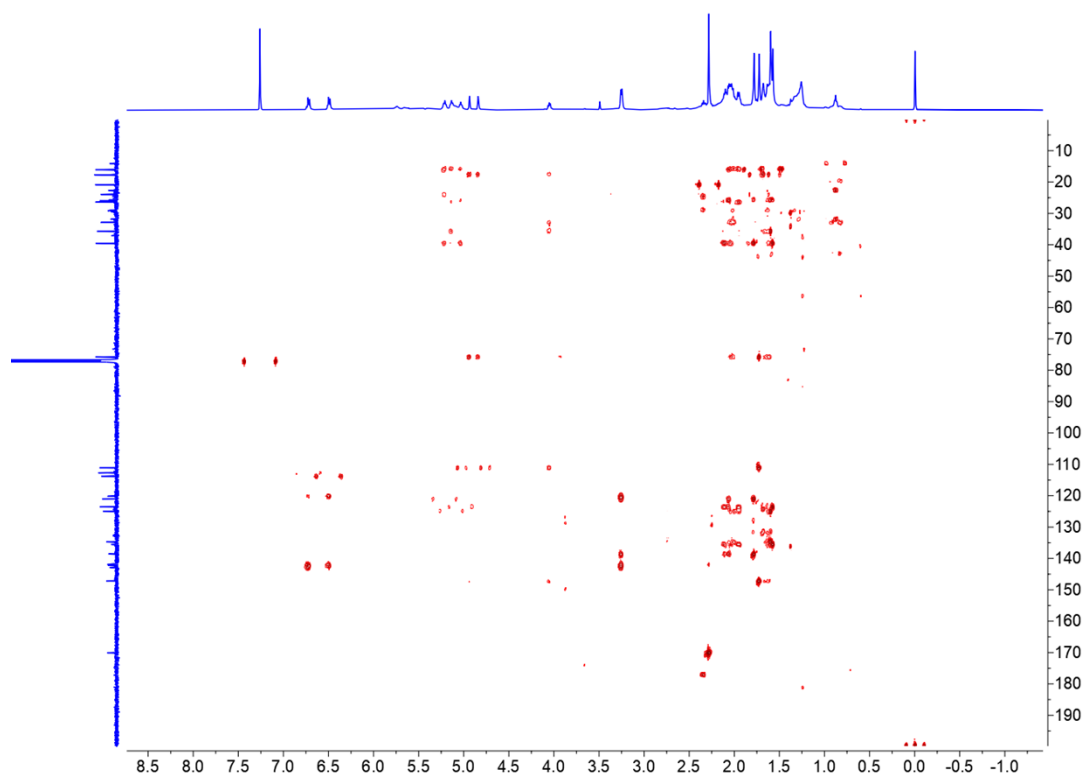

**Fig. S19.** HMBC spectrum of compound 4

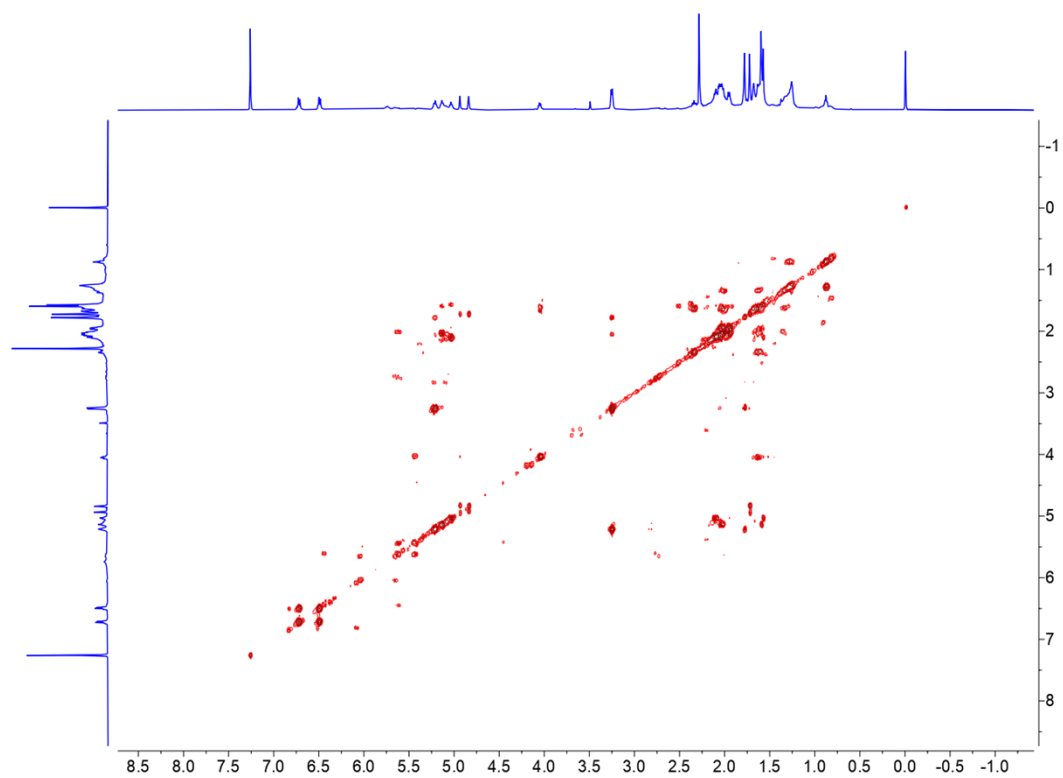

**Fig. S20.**  $^1\text{H}$ - $^{13}\text{C}$  HOSY spectrum of compound 4

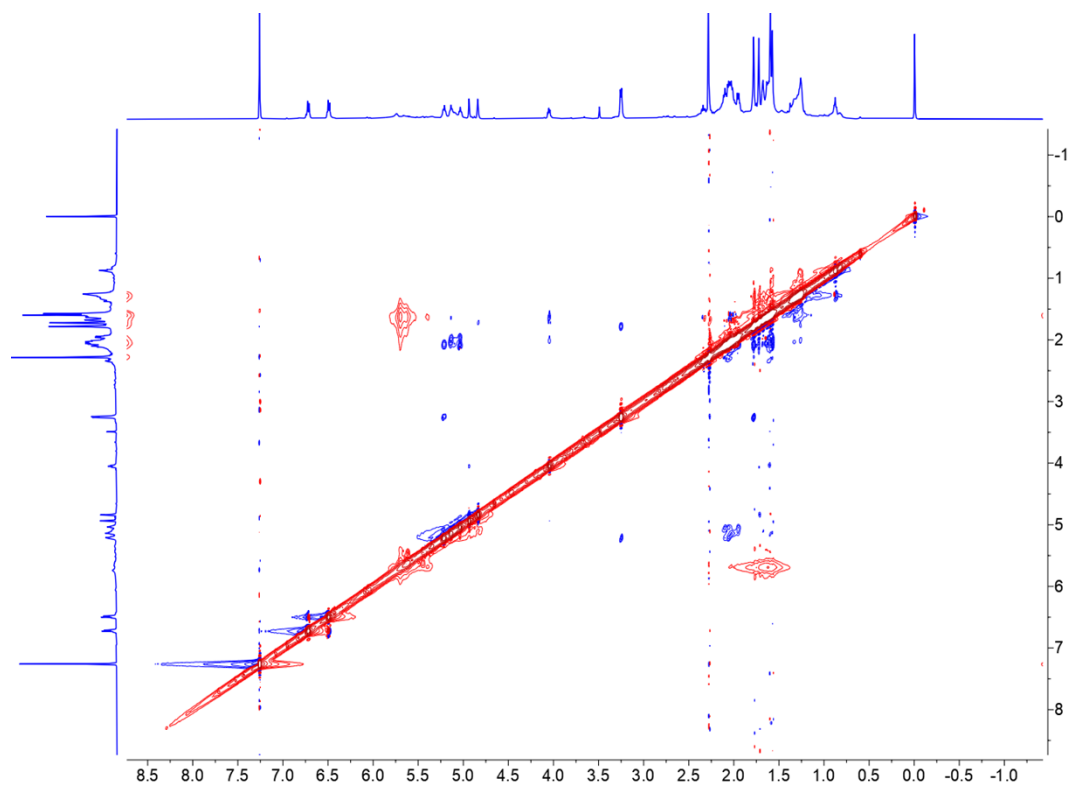

**Fig. S21.** Noesy spectrum of compound 4

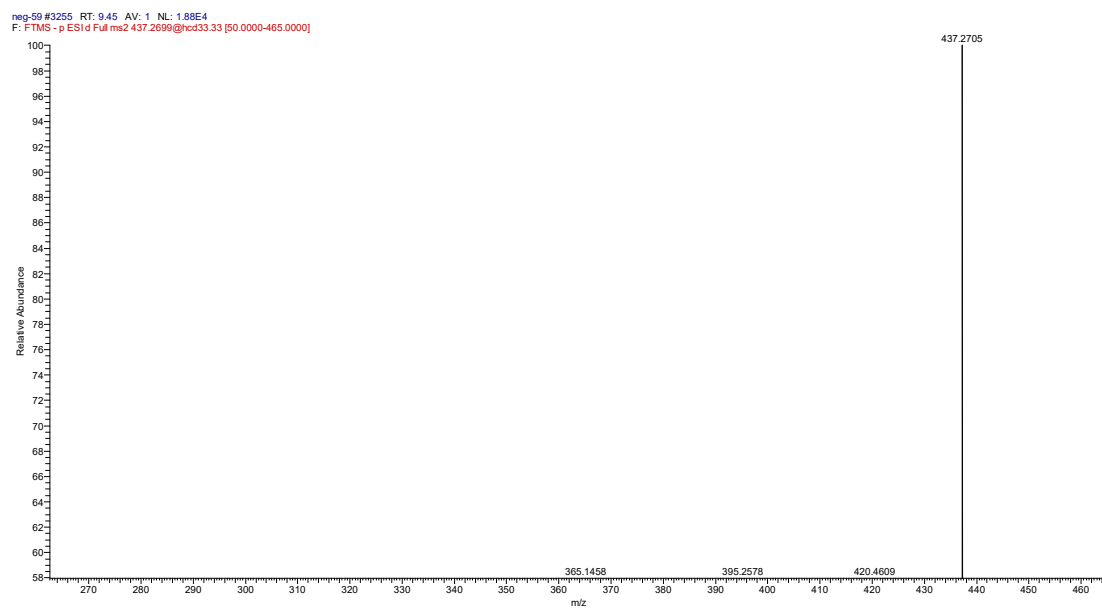

**Fig. S22.** HRESI-MS of compound 5

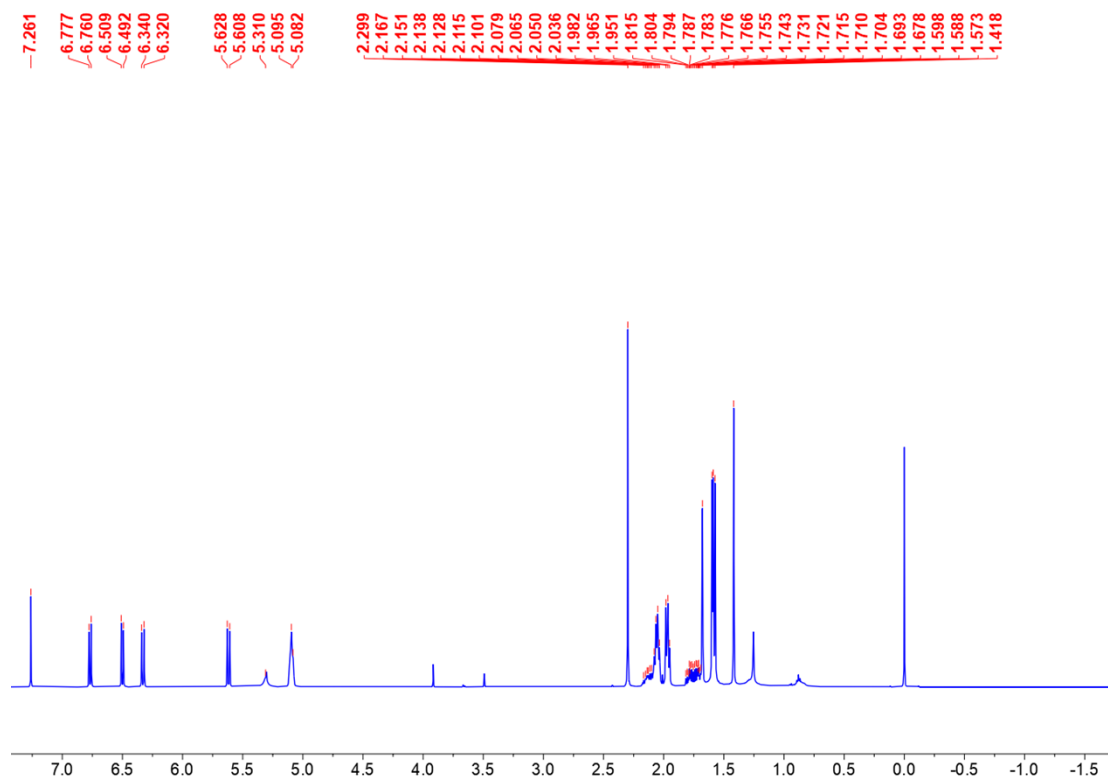

Fig. S23.  $^1\text{H}$  NMR spectrum of compound 5

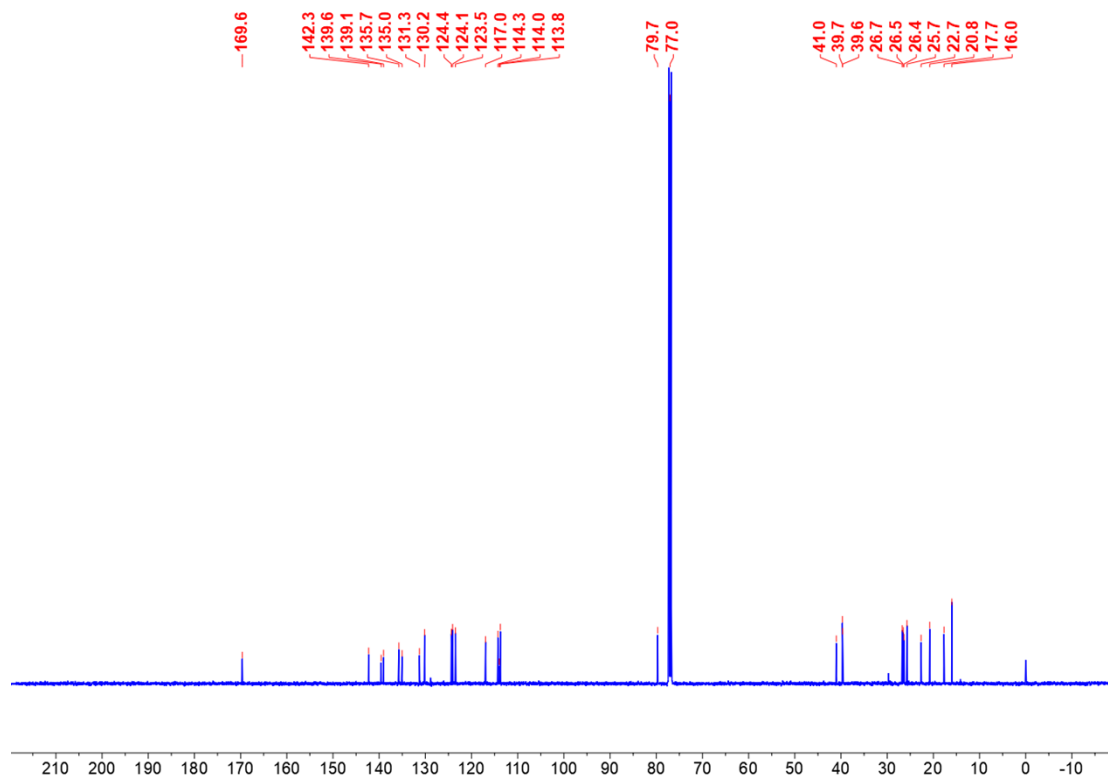

Fig. S24.  $^{13}\text{C}$  NMR spectrum of compound 5

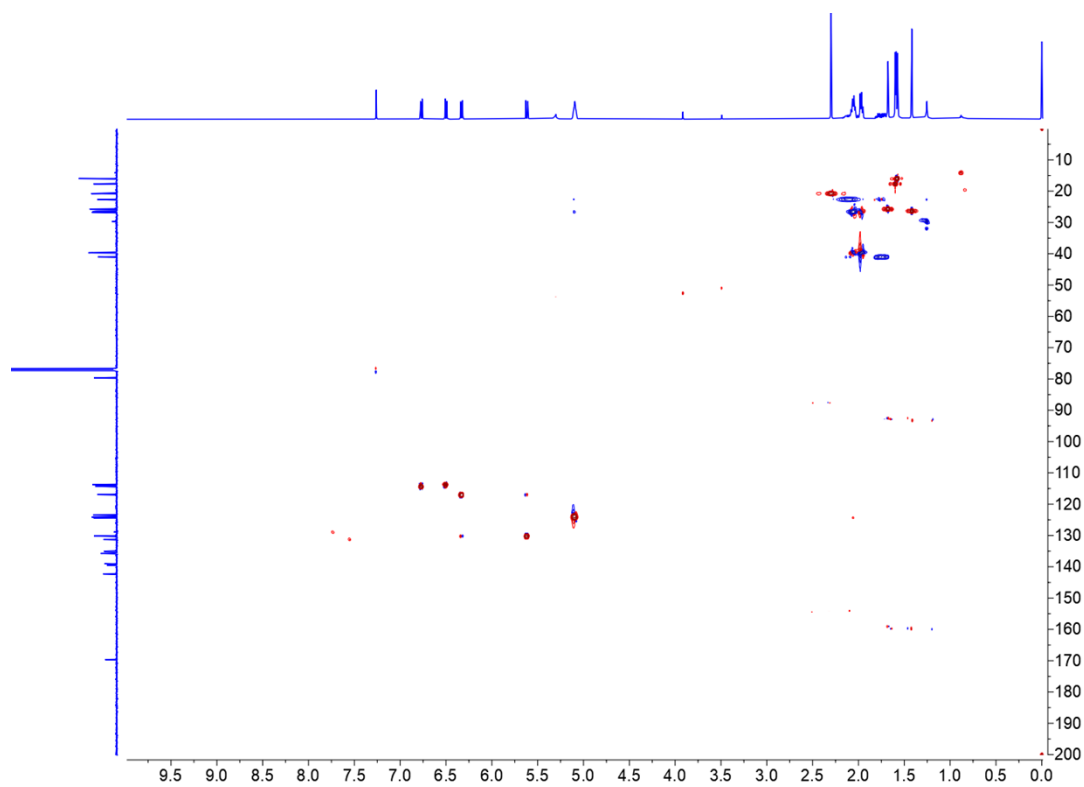

Fig. S25. HSQC spectrum of compound 5

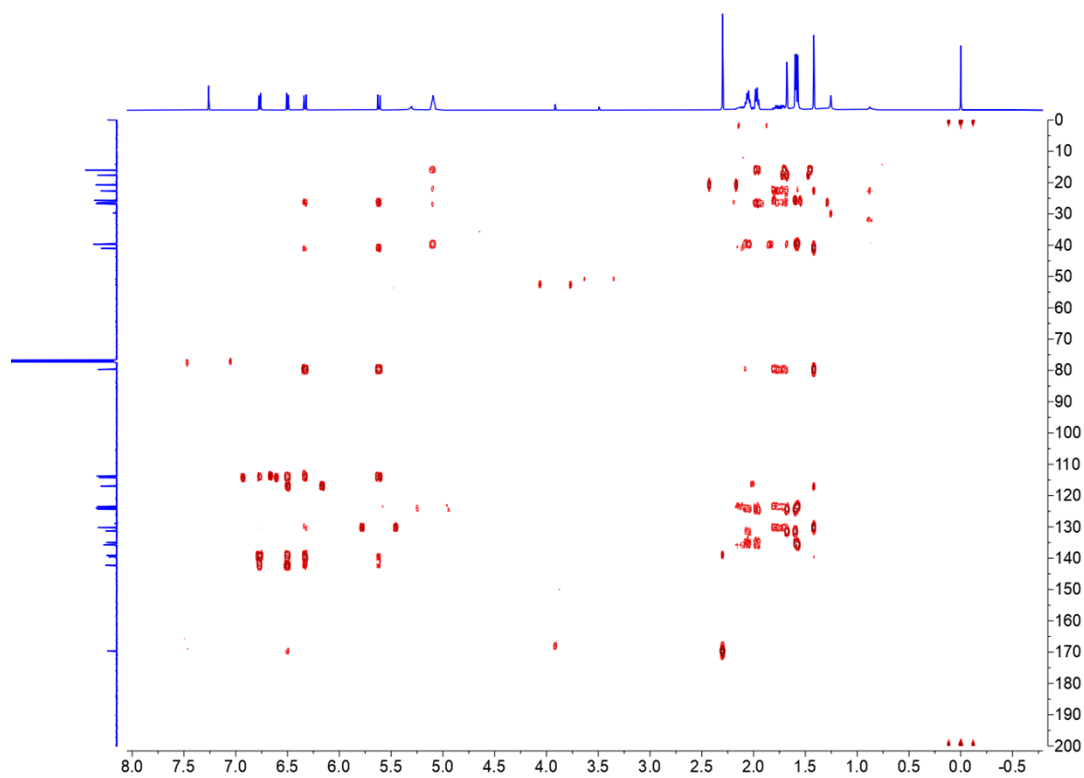

Fig. S26. HMBC spectrum of compound 5



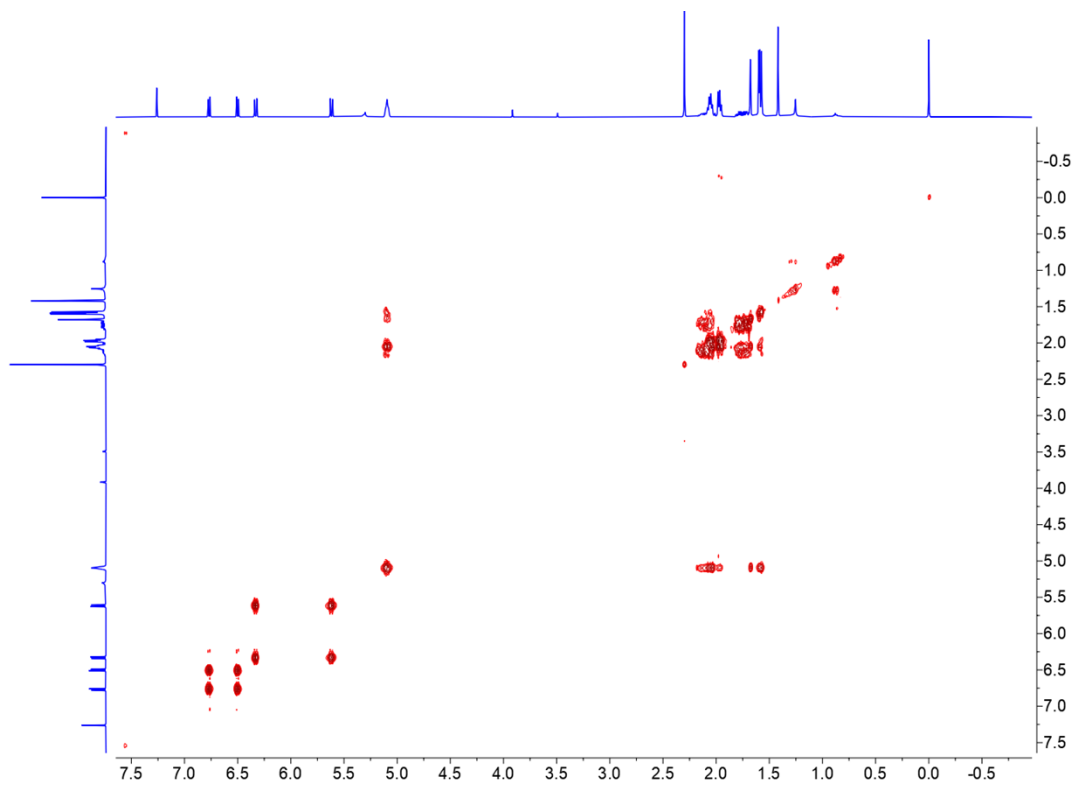

**Fig. S27.**  $^1\text{H}$ - $^1\text{H}$  COSY spectrum of compound **5**

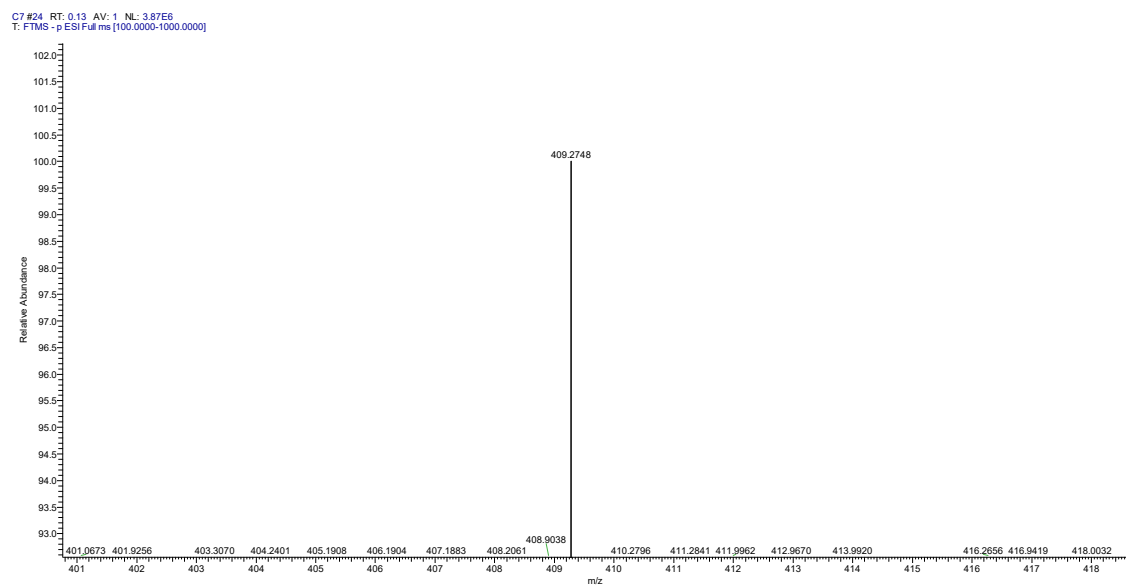

**Fig. S28.** HRESI-MS of compound **6**

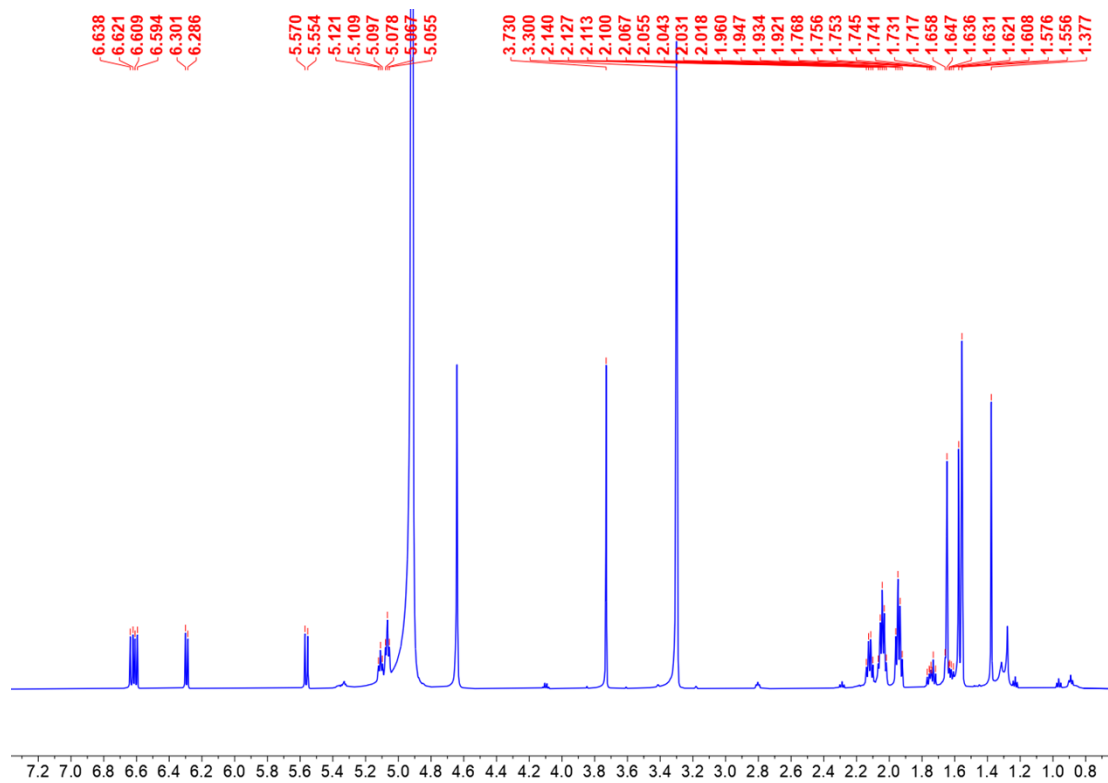

Fig. S29.  $^1\text{H}$  NMR spectrum of compound 6

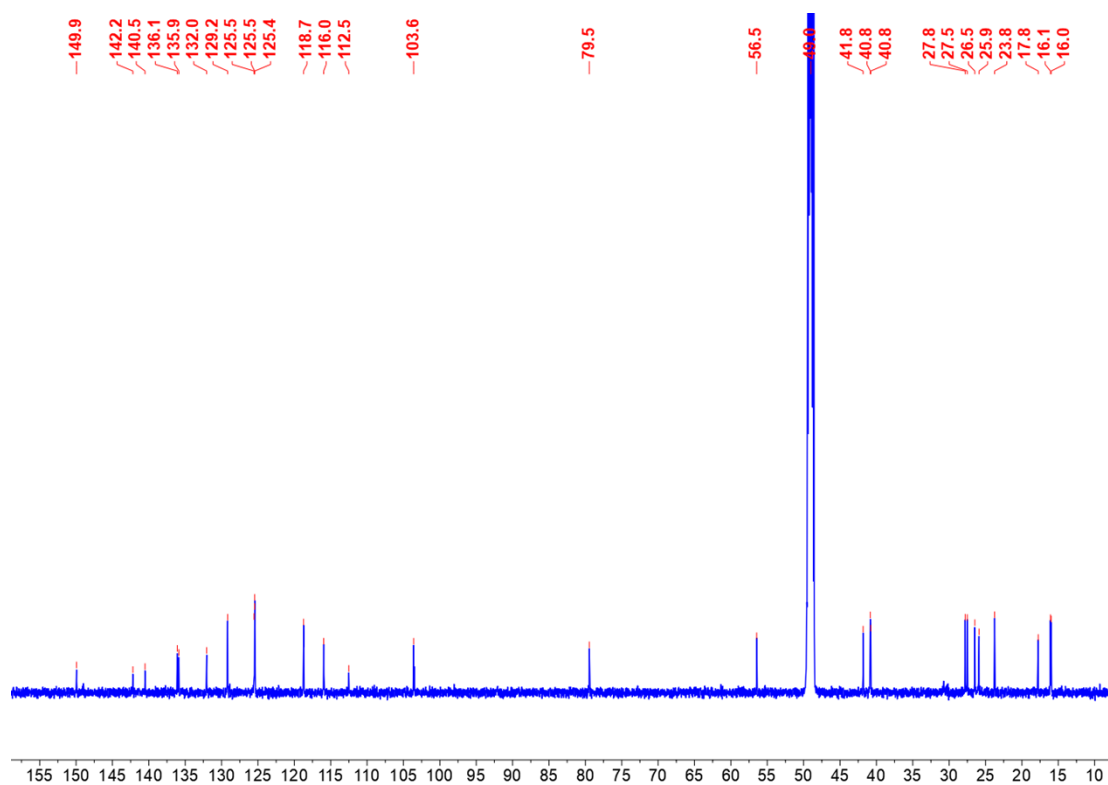

Fig. S30.  $^{13}\text{C}$  NMR spectrum of compound 6

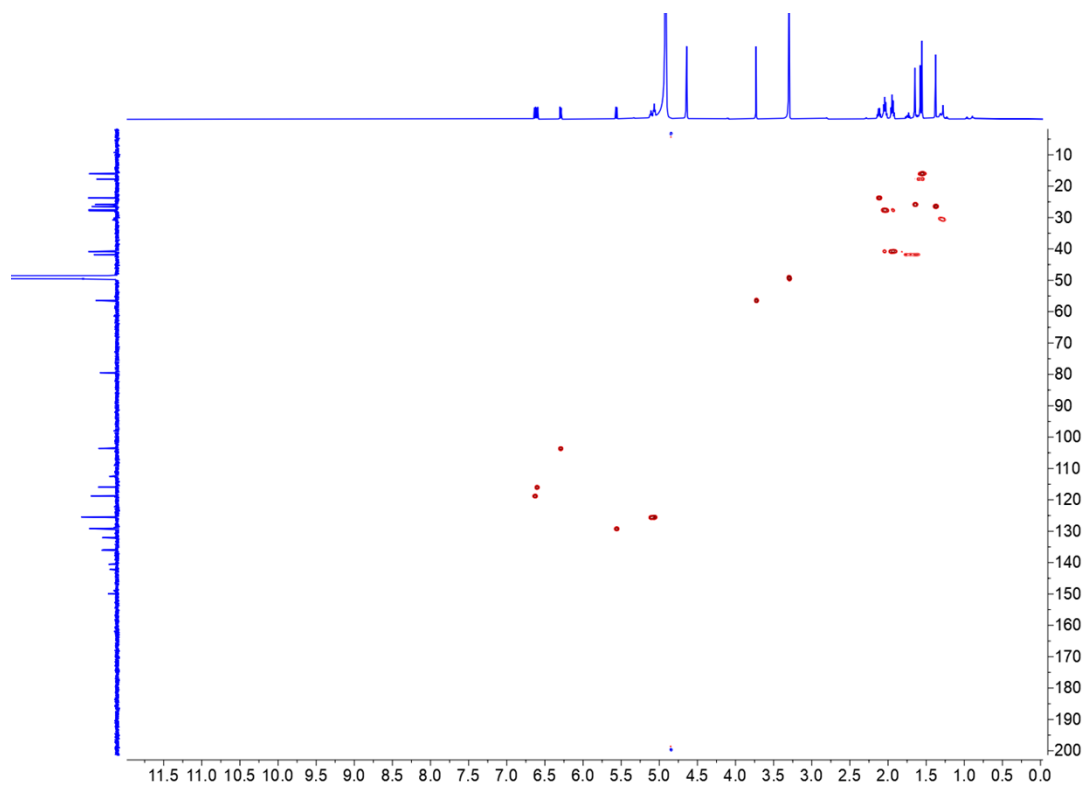

**Fig. S31.** HSQC spectrum of compound **6**

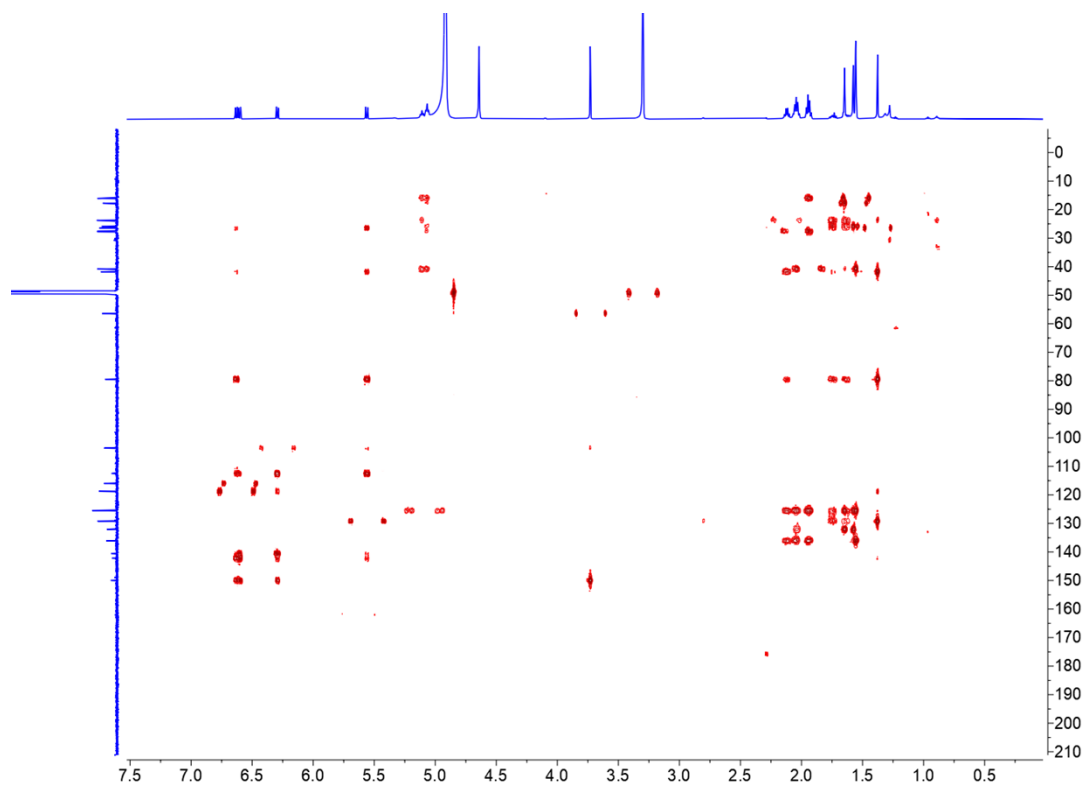

**Fig. S32.** HMBC spectrum of compound **6**

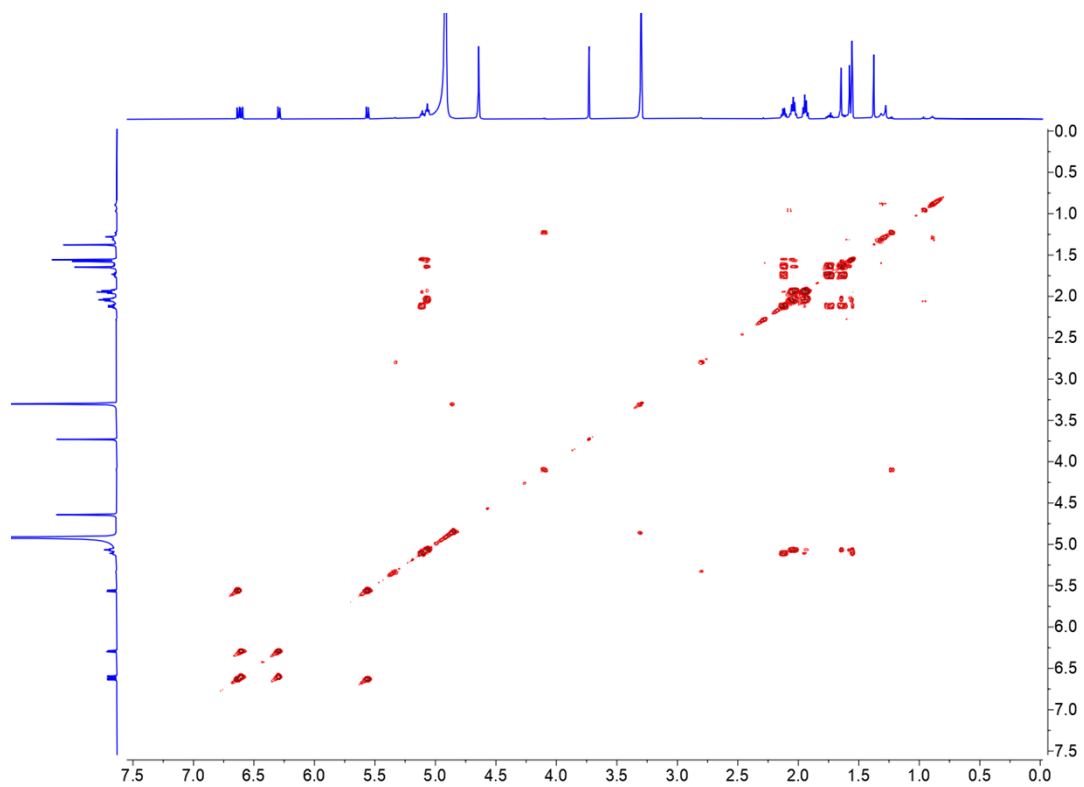

Fig. S33.  $^1\text{H}$ - $^1\text{H}$  COSY spectrum of compound 6

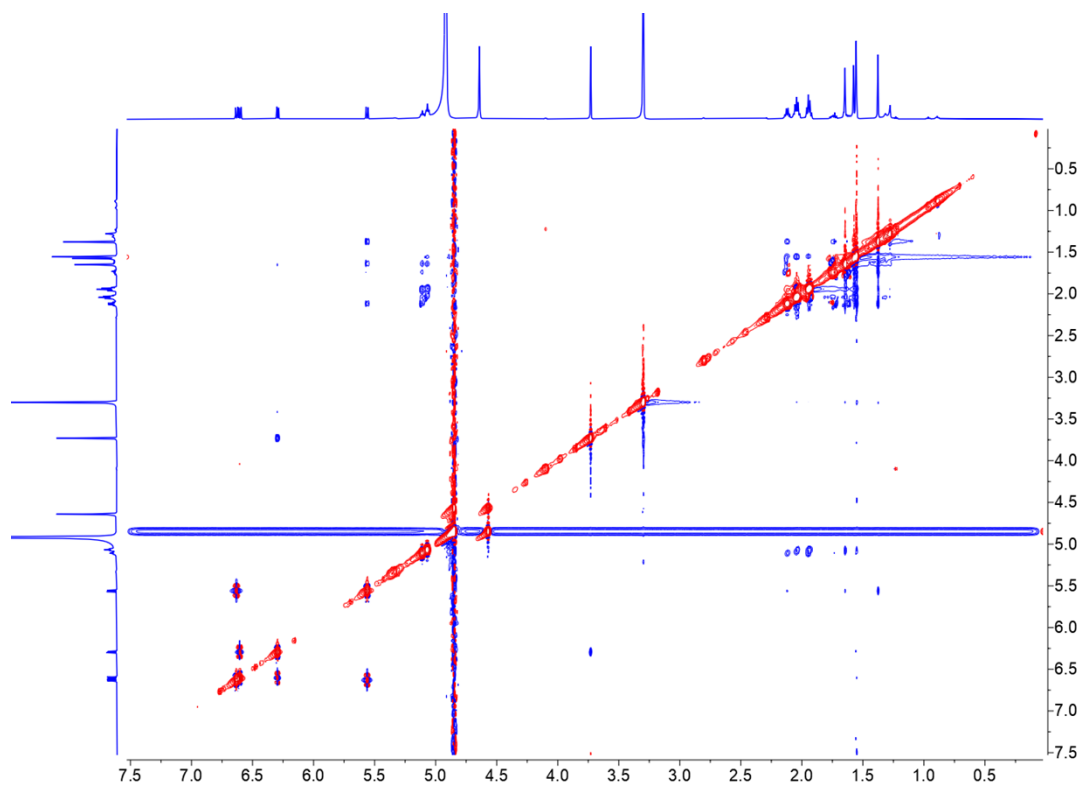

Fig. S34. Noesy spectrum of compound 6

neg-68-1 #3110 RT: 8.90 AV: 1 NL: 5.07E3  
F: FTMS - p ESI d Full ms2 455.2807@hcd33.33 [50.0000-485.0000]

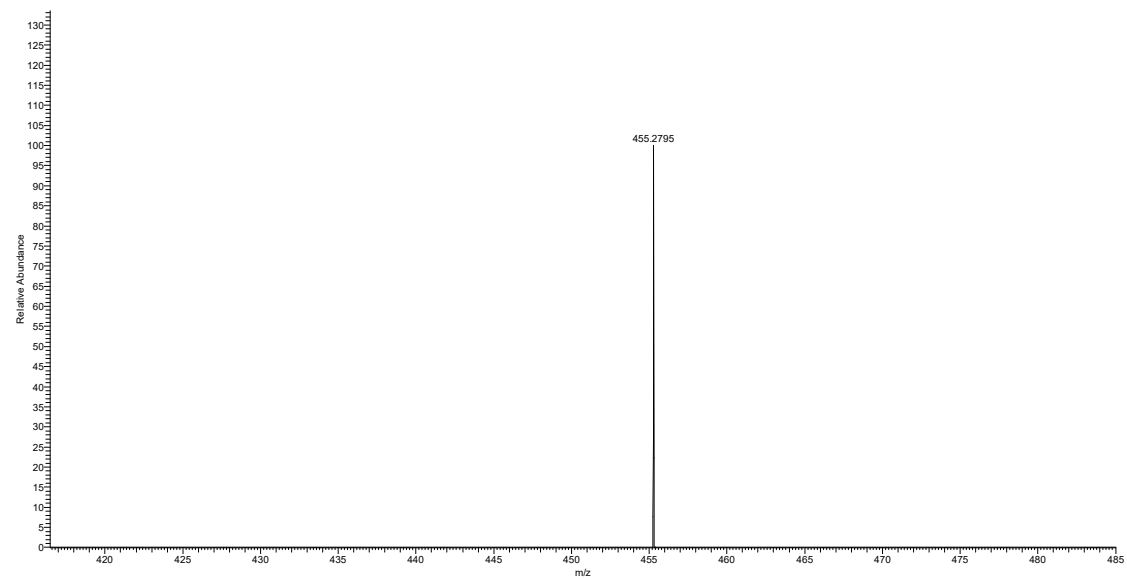

Fig. S35. HRESI-MS of compound 7

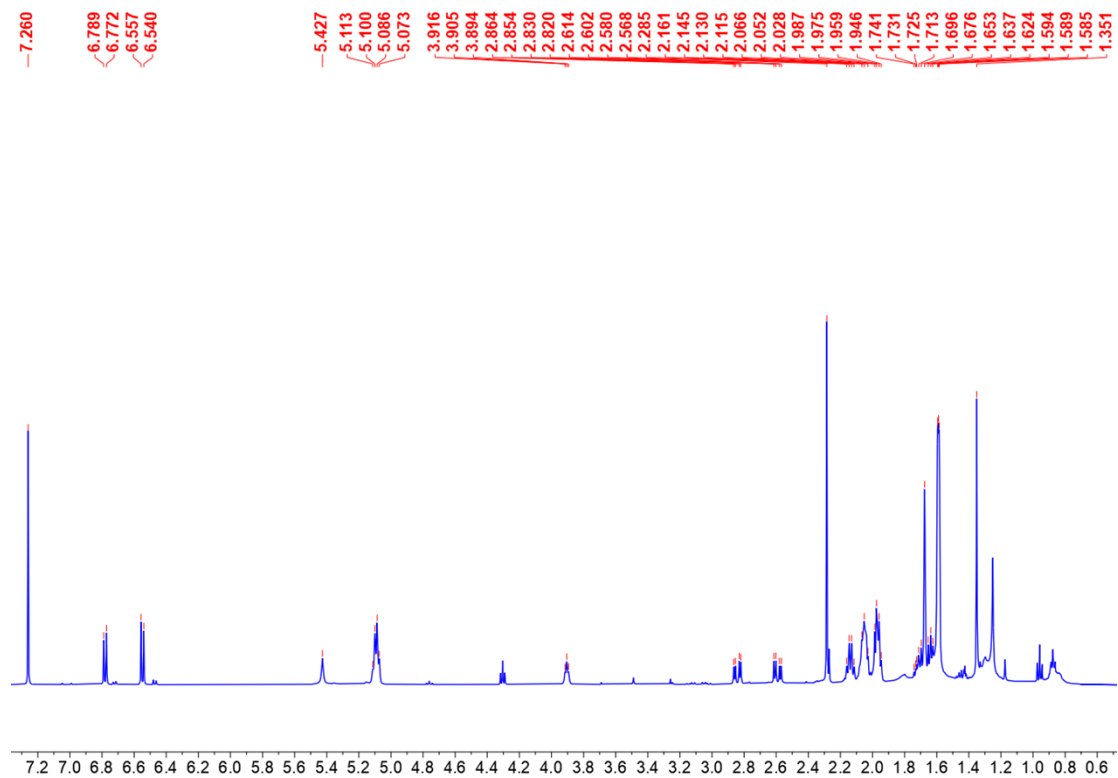

Fig. S36. <sup>1</sup>H NMR spectrum of compound 7

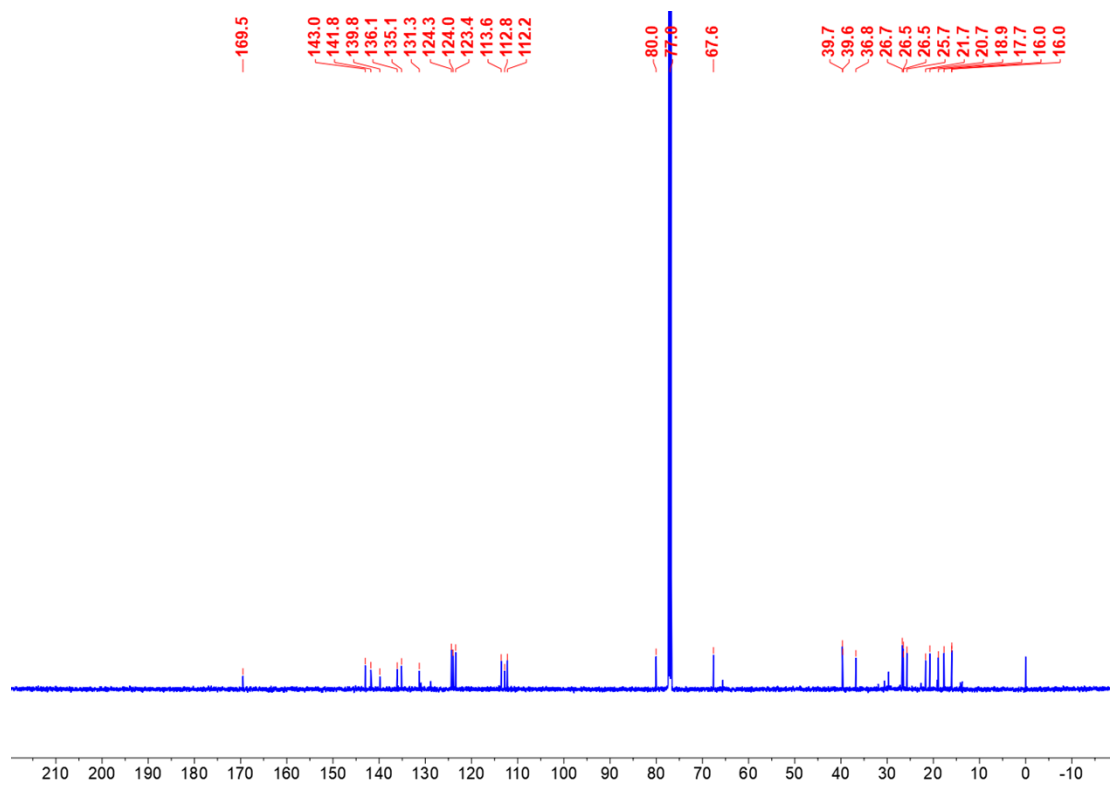

Fig. S37.  $^{13}\text{C}$  NMR spectrum of compound 7

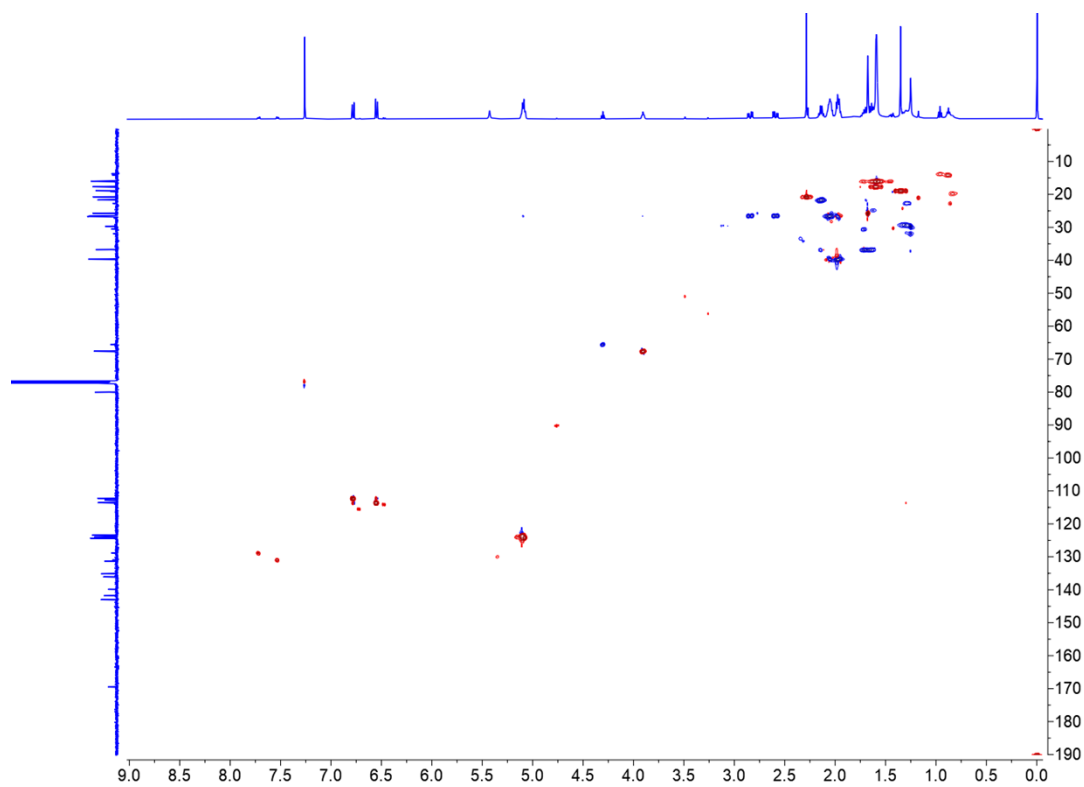

Fig. S38. HSQC spectrum of compound 7

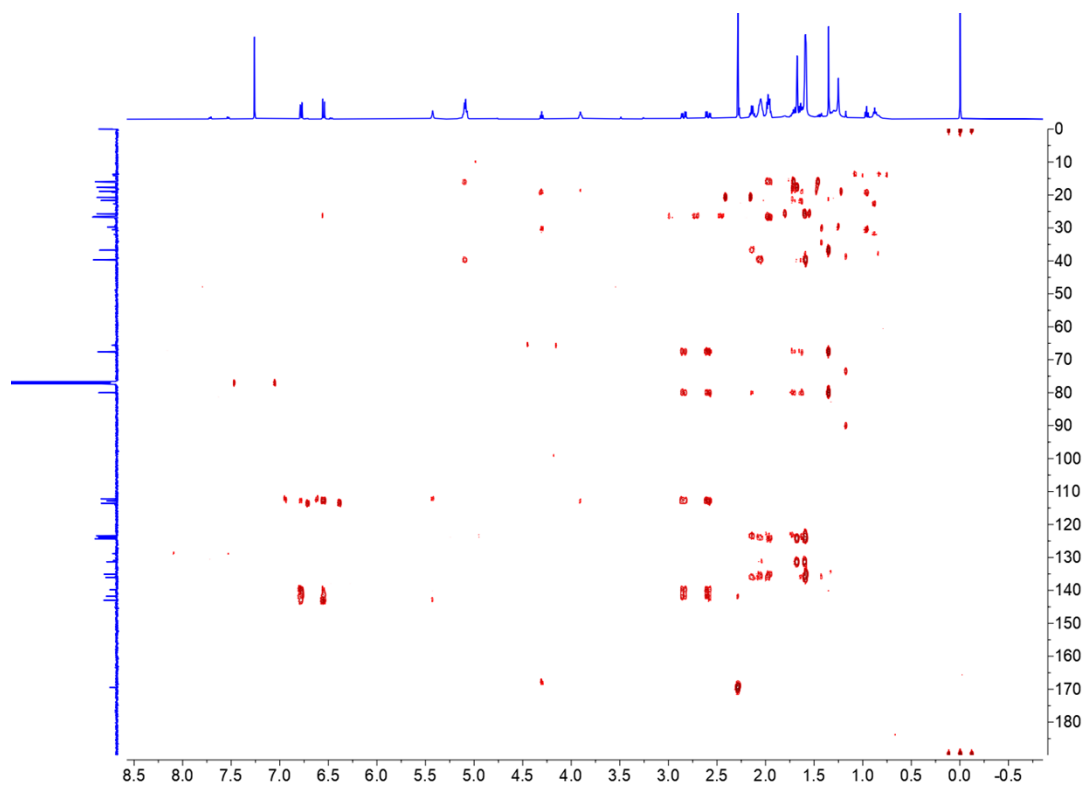

Fig. S39. HMBC spectrum of compound 7

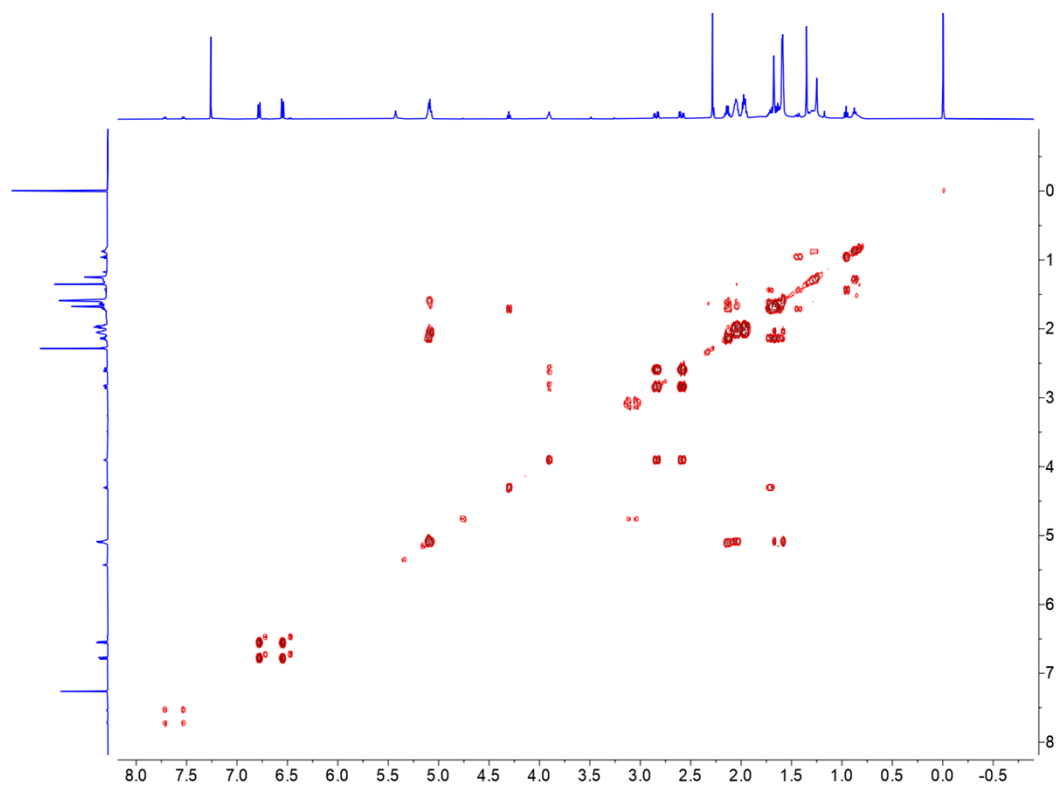

Fig. S40.  $^1\text{H}$ - $^{13}\text{C}$  HOSY spectrum of compound 7

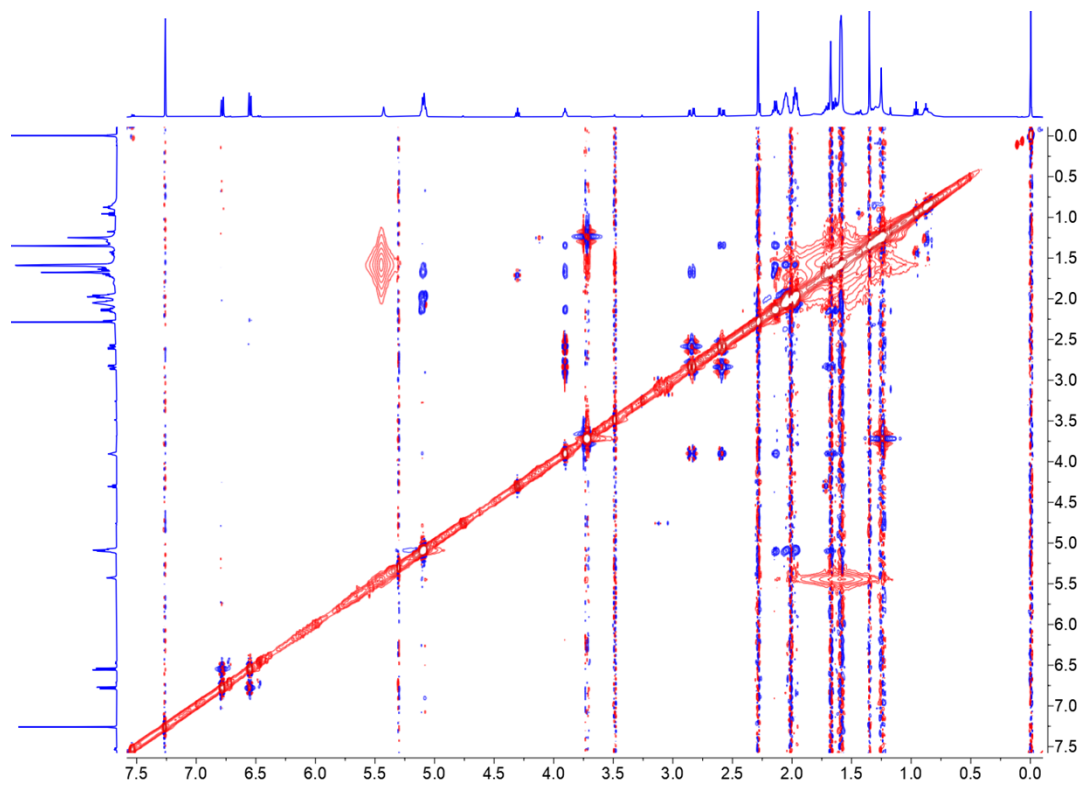

**Fig. S41.** Noesy spectrum of compound **7**

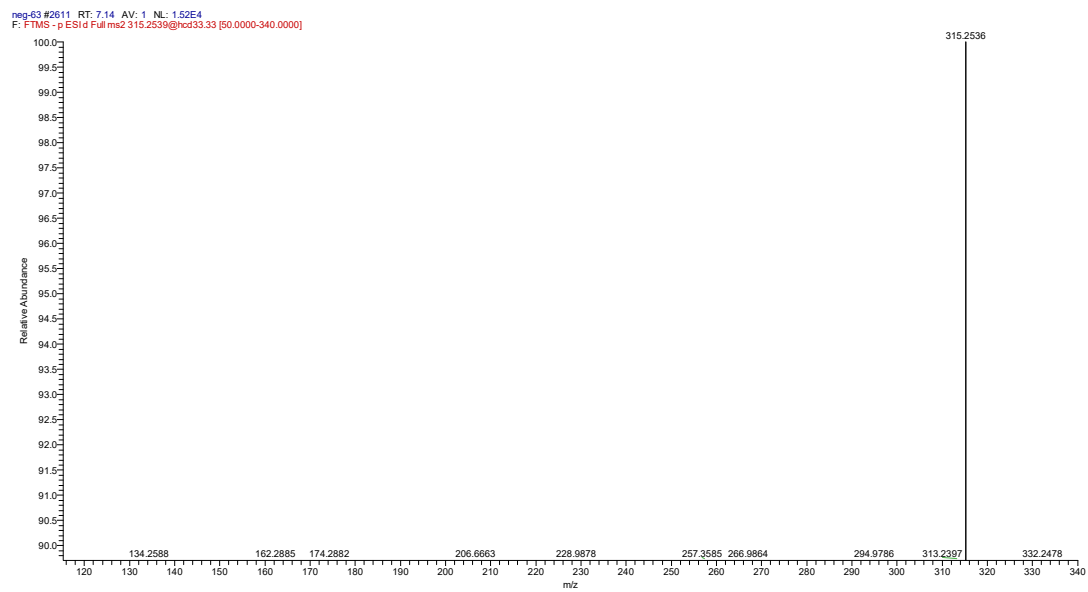

**Fig. S42.** HRESI-MS of compound **8**



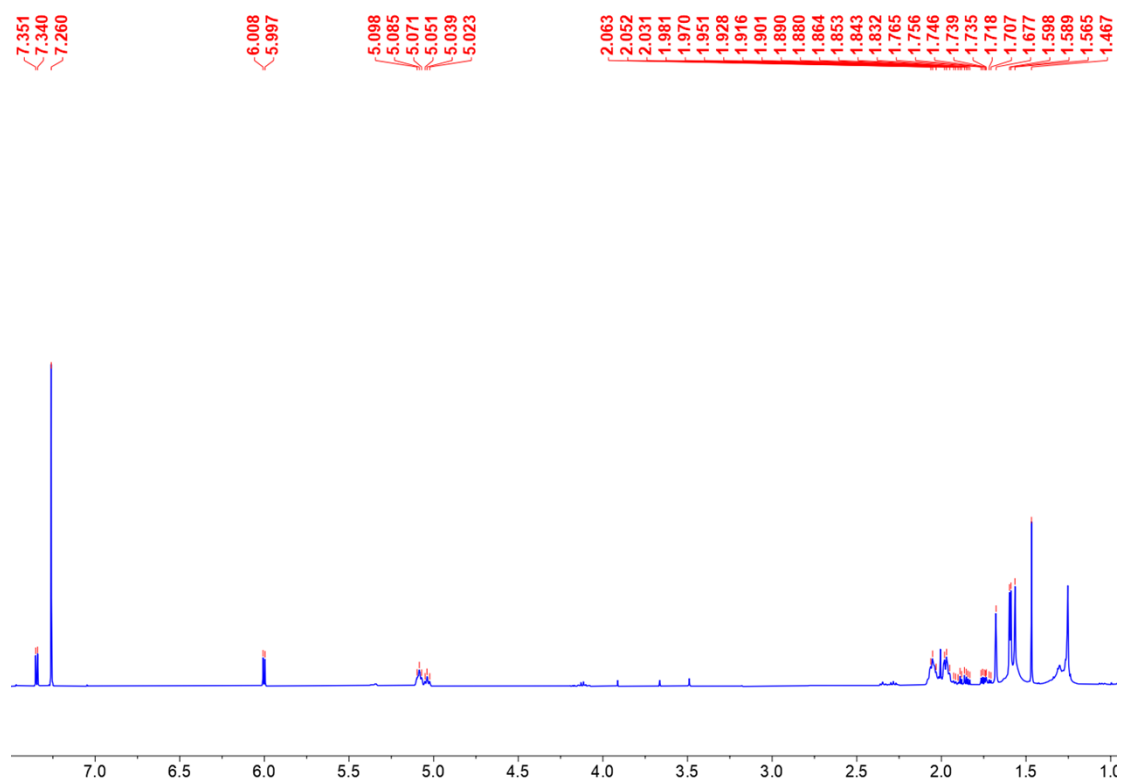

Fig. S43.  $^1\text{H}$  NMR spectrum of compound **8**

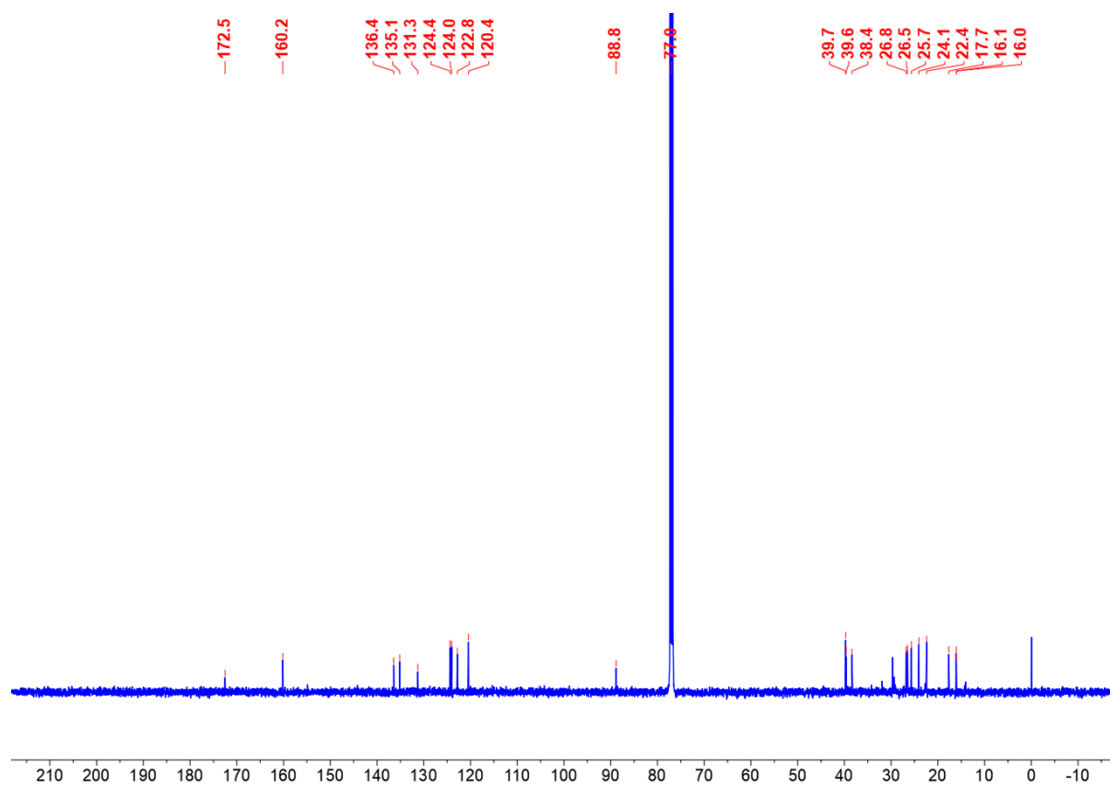

Fig. S44.  $^{13}\text{C}$  NMR spectrum of compound **8**

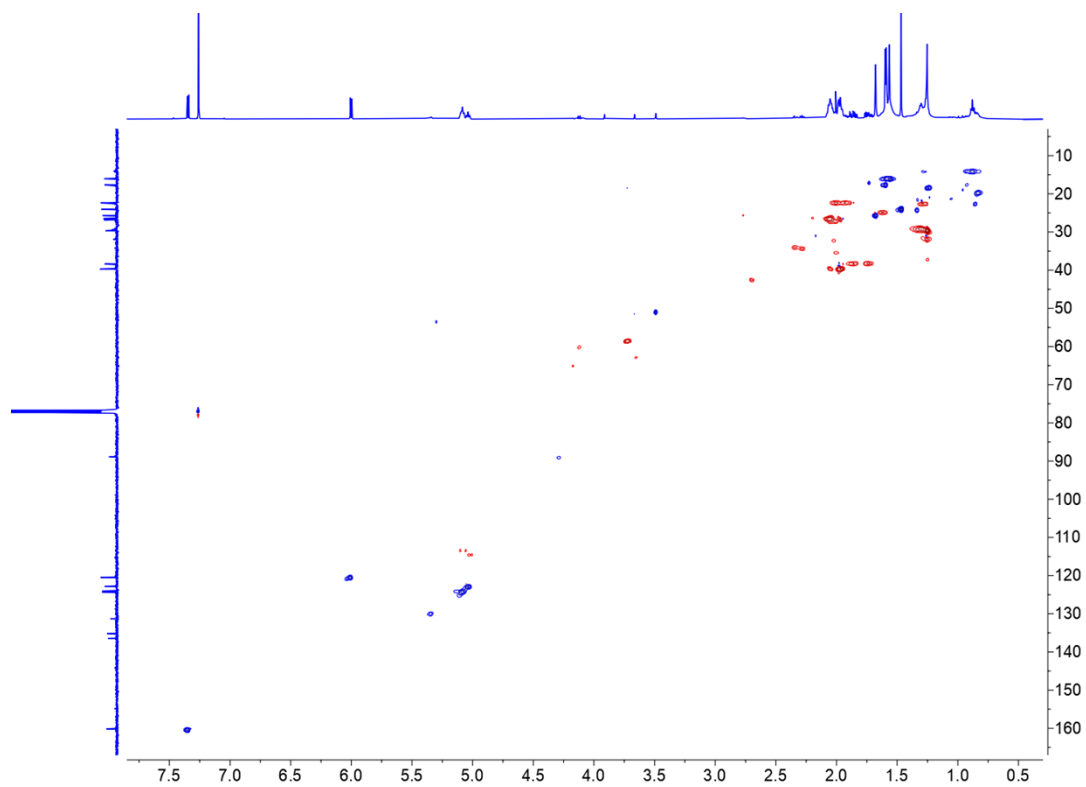

**Fig. S45.** HSQC spectrum of compound **8**

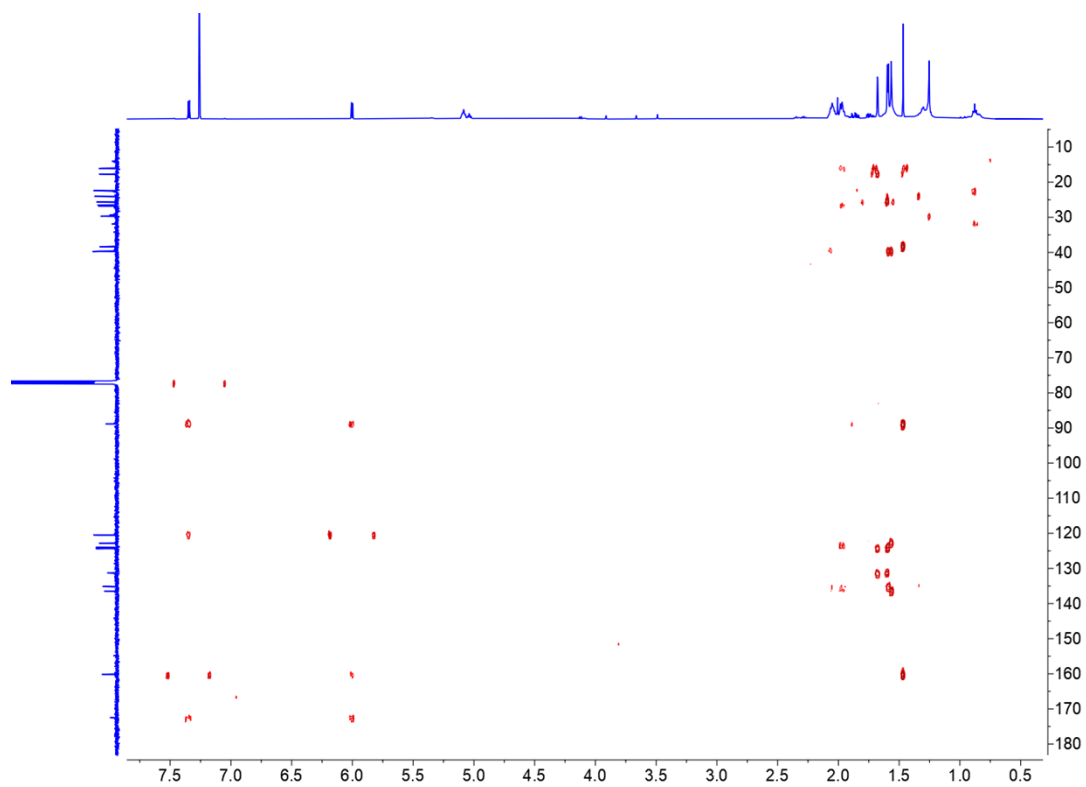

**Fig. S46.** HMBC spectrum of compound **8**

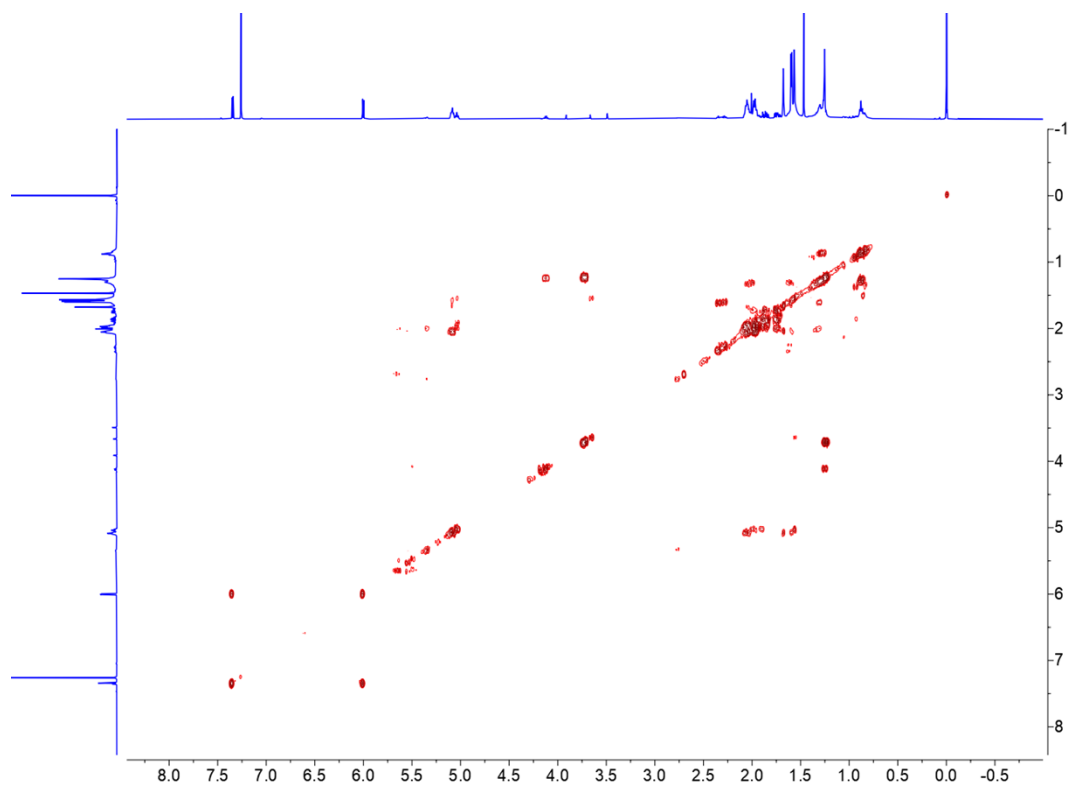

**Fig. S47.**  $^1\text{H}$ - $^1\text{H}$ COSY spectrum of compound **8**

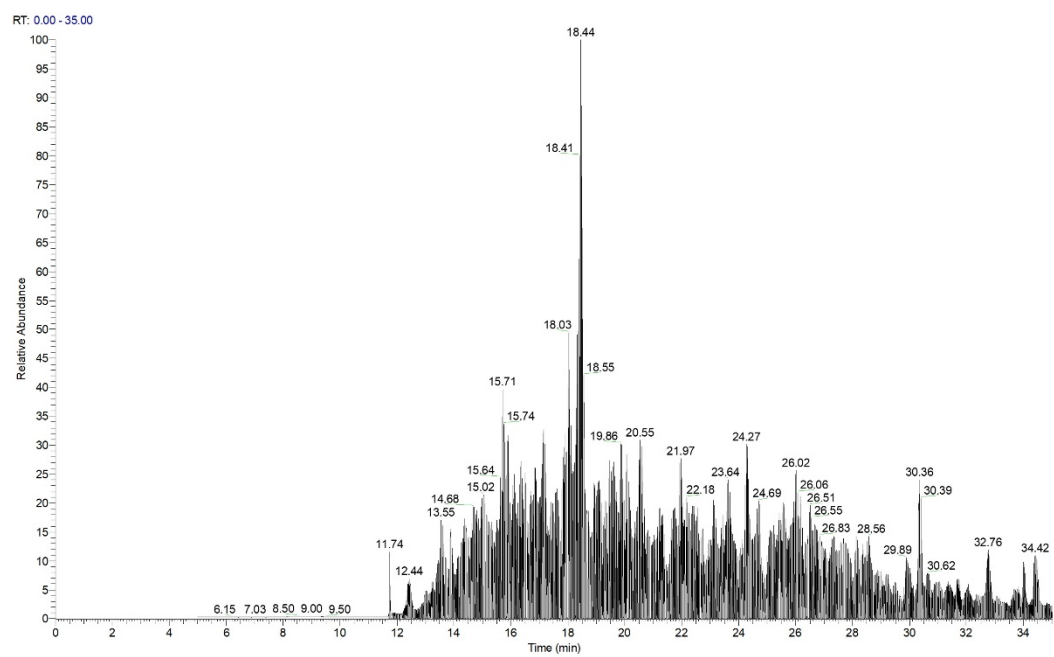

**Fig. S48.** The TIC of LC-MS/MS identification

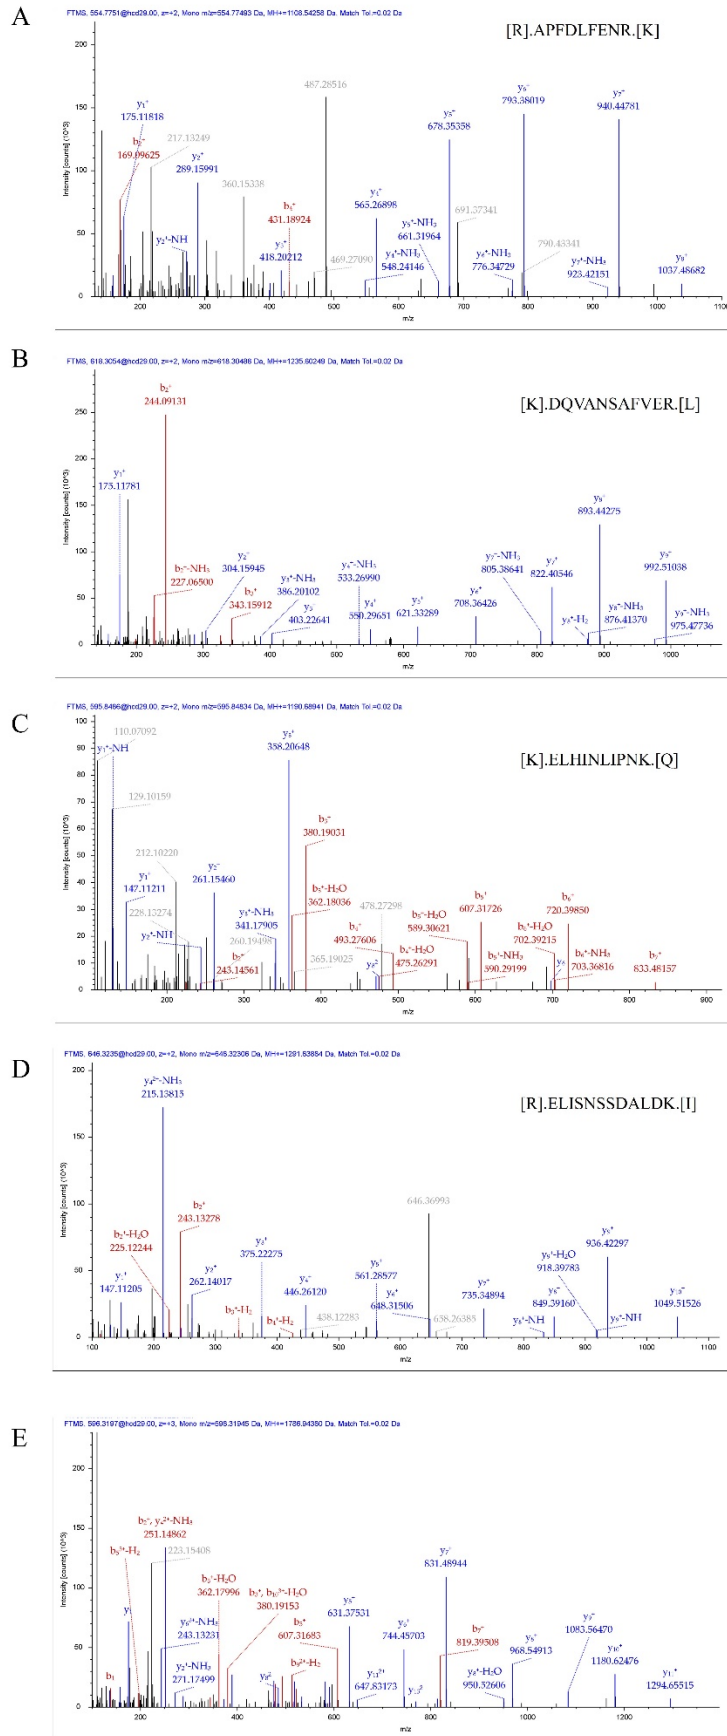

Fig. S49. HSP90AA1 peptide mass spectrograms

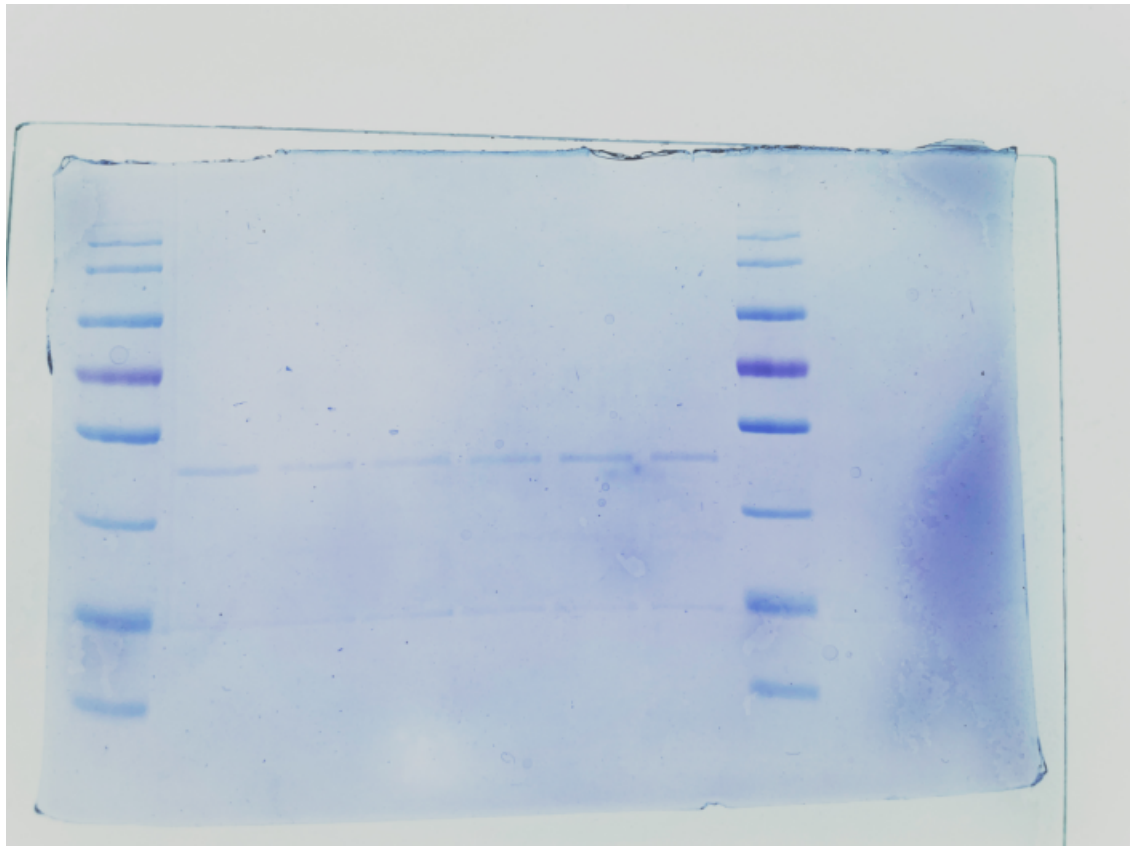

**Fig. S50.** The original image of the full gel
